# Supplementary material for: Characterization of B-Genome Specific High Copy hAT MITE Families in Brassica nigra Genome
Source: Front Plant Sci. 2020 Jul 21;11:1104. doi: 10.3389/fpls.2020.01104 (PMC7385995; doi:10.3389/fpls.2020.01104)
Supplement: Supplementary file 2 [file DataSheet_2.xlsx]

## Sheet: Table S3
Table S3. Primers and gel profile of insertion polymorphisms analysis
#	Primer ID	Tm ('c)	Product Size (bp)	Forward Primer(5'-3')	Reverse primer(5'-3')	Source					B. rapa			B. oleracea								B .nigra
									A1	A2	A3	A4	C1	C2	C3	C4	B1	B2	B3	B4	B5	B6	B7	B8	B9	B10	B11	B12	B13	B14
1	H1-1	59.855	1071	TTTAGATCGGGTTTGGGTTG	TAGATCTCGAGGCGGGTCT	B3	15983684	15984723	0	0	0	0	0	0	0	0	2	0	1	0	0	1	1	1	1	1	1	1	1	0		2 = fragment with MITE insertion
2	H1-3	59.365	1051	AATGCAGTTGGGTGATCCAT	CTTCCCTTTCTCTCGCATTT	B7	37553166	37554191	0	0	0	0	0	0	0	0	2	0	0	0	0	0	0	0	0	0	0	0	0	0		1 = fragment with no MITE insertion
3	H1-4	59.915	1198	CGGTATAGTTCGGGCTGGT	CCAAACCAAACCGTGTTCTT	B6	8917118	8918316	1	1	1	1	0	0	0	0	2	2	2	2	2	2	2	2	2	2	2	2	2	2		0 = missing / no amplification
4	H1-7	57	1015	CCATGAACCCCATTACATCC	TGAGGCACAACATGGACATT	B2	45903102	45904117	0	0	0	0	0	0	0	0	2	1	1	1	1	1	1	1	1	1	1	1	1	1
5	H1-8	57	1079	AGGGACCGTGCATGAATAAG	CAATGCGGCAATGACATTTA	B1	46707618	46708668	1	1	1	1	1	1	1	1	2	1	1	1	1	1	1	1	1	1	1	1	1	1
6	H1-9	57	1014	TGTCGTTGATCGGTCACATT	GCGGAGCCGTATCTACAAAA	B1	45269705	45270699	0	0	0	0	0	0	0	0	2	2	2	2	2	2	2	2	2	2	2	2	2	2
7	H1-10	57	1048	AATCACGTGCTCCTGCTCTT	TGTTTTTGTCGGAATGGCTA	B1	54297822	54298850	0	0	0	0	0	0	0	0	2	2	2	2	2	2	2	2	2	2	2	2	2	2
8	H1-11	57	985	TTCGAGAGGATCAACATTGC	TGAGCTGGAAAAGTCTGATAACC	B1	6859547	6860509	0	0	0	0	0	0	0	0	2	0	1	1	0	1	1	0	1	0	1	1	1	0
9	H1-12	57	852	AACGACGTAACCCGAAAACA	GGTTCTTTTGTCTACTGGGACA	B2	55645509	55646339	0	0	0	0	0	0	0	0	2	1	1	1	1	1	1	1	1	1	1	1	1	1
10	H1-13	57	937	GACAAGCTCGCACAAACAAA	CGGACAAAGTGGGTTGAATC	B2	634597	635501	0	0	0	0	0	0	0	0	2	1	1	1	1	1	1	1	1	1	1	1	1	1
11	H1-14	57	957	TAACGCCTCGTAGTCGGTTT	CCAAAGTGGGTCCTTTTGAA	B3	20930113	20931050	0	0	0	0	0	0	0	0	2	1	1	1	1	1	1	1	1	1	1	1	1	1
12	H1-16	57	880	CCCCATCCCGAGATTTAGATA	CATAATGTGATGAGAGGGACGA	B3	17078614	17079472	0	0	0	0	0	0	0	0	2	1	1	1	1	1	1	1	1	1	1	1	1	0
13	H1-17	57	943	CAACCCCATCCATGTGTGTA	TTTGCTTTGAATTATCCGAGTTT	B3	50550541	50551461	0	0	0	0	0	0	0	0	2	2	2	1	2	2	1	2	2	2	1	1	2	1
14	H1-18	57	950	GGCTGCTTGATGCAAATTCT	AAAAACTGCGGGTCAACG	B3	18845475	18846406	0	0	0	0	0	0	0	0	2	1	1	0	1	1	0	0	1	1	1	0	0	0
15	H1-20	57	860	GTGCTCATGTGATTCCGTTG	ACAGCTTCTGGACCGATCAT	B4	17340247	17341087	1	1	1	1	0	0	0	0	2	2	1	1	1	1	1	1	1	1	1	1	1	1
16	H1-22	57	923	GACAGCAAAAGAGGATACACGA	ATCAGATTGGGAGTGGTTGG	B4	13415691	13416594	0	0	0	0	0	0	0	0	2	1	1	1	1	1	1	1	1	1	1	1	1	1
17	H1-23	57	923	TCGCCACATGATTTGTTTTT	GGTCCACGTCCATGATTCTT	B5	64366827	64367730	0	0	0	0	1	1	1	1	2	1	1	1	1	1	1	1	1	1	1	1	1	1
18	H1-24	57	1067	GTCGCATTTCCGGACTTAAA	TTGTTGTTTTCTTCTTGGAATCA	B6	13151128	13152148	1	1	1	1	0	0	0	0	2	2	1	1	1	1	1	1	1	1	1	1	1	1
19	H1-25	57	928	GCCCTGTGATTTTGTTGGAT	CCAAAGAAACCTCGGAATCTC	B6	51894945	51895852	1	1	1	0	1	1	1	1	2	1	1	1	1	1	1	1	1	1	1	1	1	1
20	H1-26	57	861	GCTGTCCTTGTTGACCGATT	TTTGTCCTGGTTCGCCTAAG	B6	7962176	7963017	0	0	0	0	0	0	0	0	2	1	1	1	1	1	1	1	1	1	1	1	1	1
21	H1-27	57	855	GACAAGGGGACCACTAATCG	TGCCGTTTACCTCTTCTTGG	B1	10581555	10582391	0	0	0	0	0	0	0	0	2	1	1	1	1	1	1	1	1	1	1	1	1	1
22	H1-29	57	907	GTGTCAGCTTTGCCTTAGCC	GGGACATCCACAAACGTCAT	B3	52647264	52648151	0	0	0	0	0	0	0	0	2	1	1	1	1	1	1	1	1	1	1	1	1	1
23	H1-30	57	865	TGTATGTGTGCGAGGGAGAA	TCTCGCATTCCCATCTCTTT	B3	15485746	15486561	0	0	0	0	0	0	0	0	2	1	1	1	1	1	1	1	1	1	1	1	1	1
24	H2-1	59.58	1080	TTGTCTCGAGGAAACGGTCT	TGACACCAGCTAAACGGAAA	B6	55238471	55239443	1	1	1	1	0	0	0	0	2	1	2	1	1	2	1	1	1	1	1	1	2	1
25	H2-2	59.9	1013	ATGTGGCCATGATCAGCTTC	GGAACTAAAGCAAGTGGTTGG	B7	50816591	50817583	0	0	0	0	1	1	1	1	2	2	2	1	2	2	1	2	1	1	1	2	2	0
26	H2-3	59.975	1131	TGCTAACGGAAGACGTTCCT	TGGTAGCCATCTCATGACCA	B2	9858732	9859843	0	0	0	0	1	1	1	1	2	1	1	1	1	1	1	1	1	1	1	1	1	1
27	H2-4	60.04	1165	CCGACAAAGCCAAGATTGTT	ACCCTCACCCCAAGAGAACT	B2	59930031	59931176	1	1	1	1	1	1	1	1	2	1	1	1	1	1	1	1	1	1	1	1	1	1
28	H2-5	59.275	1152	CGTTGGTTCTTTACCCGTTT	AATCCAACTCGAAGGCACAT	B2	50473346	50474478	0	0	0	0	0	0	0	0	2	2	2	2	2	2	2	2	1	2	2	2	2	1
29	H2-6	59.93	1027	TTGATTGGTGGGTAAGGATTTT	TTGTCGTCATGCAAGCAAAT	B2	65058385	65059392	0	0	0	0	0	0	0	0	2	1	1	1	1	1	1	1	1	1	1	1	1	1
30	H2-7	57	995	TTGTGCCGAATTTTGTTTGA	CGCAACTGAAGCATGGACTA	B4	12299123	12300097	0	0	0	0	0	0	0	0	2	1	1	1	1	1	1	1	1	1	1	1	1	1
31	H2-8	57	966	AACCACATTCTGAATCGACTTT	CGGAATATGGGTTCTTTACCC	B2	66975683	66976628	0	0	0	0	0	0	0	0	2	2	2	2	2	2	2	2	2	2	2	2	2	1
32	H2-9	57	1041	TTCAACCAAAACGGGTCATT	AGATCTCGCATGCAAAAAGC	B3	29063907	29064928	0	0	0	0	0	0	0	0	2	1	1	1	1	1	1	1	1	1	1	1	1	1
33	H2-10	57	994	AAAAACGGTTGGCTTTGATG	TGACACCAGCTAAACGGAAA	B6	55238557	55239443	0	0	0	0	0	0	0	0	2	1	1	1	1	1	1	1	1	1	1	1	1	1
34	H2-11	57	1008	TTGACACGTGCGTGTAACAG	AGAAGAGGAGGAGCGGAAAC	B1	1141960	1142948	0	0	0	0	0	0	0	0	2	1	2	1	1	2	1	2	1	1	1	2	1	1
35	H2-12	57	979	CTTCAGAACAAGGCCTCAAAA	CGCCTGCCCCTAAATCTATAA	B2	8422509	8423467	0	0	0	0	0	0	0	0	2	1	1	1	1	1	1	1	1	1	1	1	1	1
36	H2-13	57	862	GAGGCCTCCATGTGGACTAA	CCTTTTACACGCGATTCACA	B2	51774854	51775696	0	0	0	0	0	0	0	0	2	1	1	1	1	1	1	1	1	1	1	1	1	1
37	H2-14	57	936	GAAGAAAGGTGAGGCCACTG	TGCACGCAGAGTGATAGAGC	B2	3431672	3432588	0	0	0	0	2	2	2	2	2	2	2	2	2	2	2	2	2	2	2	2	2	1
38	H2-15	57	958	TGTGATCGCTTTGGAGAGTG	AGGCGTGGGTGAACCTATAA	B3	18619783	18620721	0	0	0	0	0	0	0	0	2	1	1	2	1	1	2	1	2	2	1	2	1	0
39	H2-16	57	1015	TATGCGGTTGCATTTACACG	CACGATGAGGGTTTGGAATC	B3	3786589	3787584	0	0	0	0	0	0	0	0	2	0	2	0	0	2	0	2	2	0	0	2	2	0
40	H2-17	57	961	GCCCTTAACATCTGGATGGA	CGTCCACAATTAACGGACCT	B3	53986931	53987872	0	0	0	0	0	0	0	0	2	1	1	1	1	1	1	1	1	1	1	1	1	1
41	H2-18	57	896	GGCAACGTATACAAGGGACA	AGCGATTTGTAGCGGTTTGT	B4	5831888	5832784	0	0	0	0	0	0	0	0	2	1	1	1	1	1	1	1	1	1	1	1	1	1
42	H2-19	57	968	GTTCCAGCTCACTCCCACTC	AATGCAGTCTTTCGACTTCCA	B4	6360580	6361527	0	0	0	0	0	0	0	0	2	1	1	1	1	1	1	1	0	0	0	0	0	0
43	H2-20	57	881	CTCTACGGGAGTACGGGTCA	AATGCCATTCACGTTGAAAA	B4	7422021	7422882	0	0	0	0	0	0	0	0	2	1	1	1	1	1	1	1	1	1	1	1	1	1
44	H2-21	57	864	GCGAGTCACACGACTGTGTT	GCCAATAGCCCATTTGACAT	B5	25298108	25298952	0	0	0	0	0	0	0	0	2	1	1	1	1	1	1	1	1	1	1	1	1	1
45	H2-22	57	905	GATTGCATGTGGTTGACGAA	GGCTTGACTTTGACCGAAGA	B5	67905059	67905944	0	0	0	0	0	0	0	0	2	1	1	1	1	1	1	1	1	1	1	1	1	1
46	H2-23	57	860	TCGGTCAATGCGAGAGATTA	CACTGCGCCACATTTGATAA	B6	51950671	51951511	1	1	1	1	1	1	1	1	2	1	1	1	1	1	1	1	1	1	1	1	1	1
47	H2-24	57	888	TTCCCTCACGGATACTCTGAA	CGTTTGGTGTCGTTGATTTG	B6	10244882	10245750	0	0	0	0	0	0	0	0	2	2	2	2	2	2	2	2	1	2	2	2	2	1
48	H2-25	57	887	CCCTTGTATAGTCATGGGTTCA	CTGGGGTGGATTCTGTTGTT	B7	54530982	54531849	0	0	0	0	0	0	0	0	2	1	1	2	1	1	2	1	1	1	1	1	1	1
49	H2-26	57	933	ATTAAACCAGCGGAAAAGCA	GAAAAGAAAGACGGGCGATA	B7	3371411	3372324	0	0	0	0	0	0	0	0	2	1	1	1	1	1	1	1	1	1	1	1	1	1
50	H2-27	57	907	TGTCAACCGACCTTCATTCA	CCTTTTTGAGCCTTTCATAATTG	B7	49427208	49428092	0	0	0	0	0	0	1	1	2	1	1	1	1	1	1	1	1	1	1	1	1	1
51	H2-28	57	913	TCTTGGGCTAACACATGCAG	CGACCGACTAACGCTTAGGA	B8	56295056	56295946	0	0	0	0	0	0	0	0	2	1	1	1	1	1	1	1	1	1	1	1	1	1
52	H2-29	57	898	GGGCTTTTTGCTTCTGTTGT	CTGAACGCGCTACTGTTTGA	B8	26659123	26659999	0	0	0	0	0	0	0	0	2	1	1	1	1	1	1	1	1	1	1	1	0	0
53	H2-30	57	851	AAAGATATCTGGAACCCTCTTTC	TCTTTAATATGGGGCAACAAGTG	B8	5721407	5722235	0	0	0	0	0	0	0	0	2	1	1	1	1	1	1	1	1	1	1	1	1	1

## Sheet: Table S7 
Table S7. Members and position annotation of BniHAT-1 family members in the B. nigra genome
												Brassica nigra Paralog genes
#	ID	Chr#	Start	End	Identity	Size	E-value	MITE Position	B. nigra _gene	Arabidopsis ortholog	LF	MF1	MF2
1	BniHAT1	B3	16111216	16111888	100	673	0	1kb_flank	BniB03g033670.2N.1
2	BniHAT1	B3	25375181	25375861	94.868	682	0	intergenic
3	BniHAT1	B3	17078771	17079460	93.632	691	0	2kb_flank	BniB03g035080.2N.1
4	BniHAT1	B3	30627599	30628266	93.778	675	0	intergenic
5	BniHAT1	B3	21218122	21217457	93.63	675	0	intergenic
6	BniHAT1	B3	3172874	3172210	93.333	675	0	2kb_flank	BniB03g008110.2N.1	AT1G19220	BniB04g033820.2N.1		BniB03g008110.2N.1
7	BniHAT1	B3	26635917	26635248	93.205	677	0	intergenic
8	BniHAT1	B3	54524018	54523349	93.225	679	0	1kb_flank	BniB03g070020.2N.1	AT2G20370	BniB03g070020.2N.1		BniB04g024400.2N.1
9	BniHAT1	B3	30693085	30693756	93.098	681	0	intergenic
10	BniHAT1	B3	17221390	17222046	92.741	675	0	1kb_flank	BniB03g035260.2N.1
11	BniHAT1	B3	12891031	12891693	92.206	680	0	intergenic
12	BniHAT1	B3	16816042	16816710	92.035	678	0	intergenic
13	BniHAT1	B3	51266326	51266993	92.059	680	0	1kb_flank	BniB03g066670.2N.1
14	BniHAT1	B3	8428900	8428227	91.813	684	0	1kb_flank	BniB03g019210.2N.1
15	BniHAT1	B3	12024511	12023844	91.471	680	0	1kb_flank	BniB03g026380.2N.1	AT1G15670	BniB06g041020.2N.1	BniB03g026380.2N.1
16	BniHAT1	B3	24956416	24957079	91.568	676	0	2kb_flank	BniB03g047540.2N.1	AT1G69830	BniB03g047540.2N.1
17	BniHAT1	B3	10046133	10045481	91.691	674	0	intergenic
18	BniHAT1	B3	24897604	24896941	91.336	681	0	intergenic
19	BniHAT1	B3	30591849	30592505	91.471	680	0	intergenic
20	BniHAT1	B3	6814839	6815502	91.043	681	0	1kb_flank	BniB03g015880.2N.1	AT4G14210	BniB06g067310.2N.1	BniB03g015880.2N.1
21	BniHAT1	B3	43330834	43330178	91.163	679	0	1kb_flank	BniB03g061490.2N.1
22	BniHAT1	B3	51085916	51085239	90.205	684	0	2kb_flank	BniB03g066490.2N.1
23	BniHAT1	B3	12094038	12094682	91.172	657	0	1kb_flank	BniB03g026540.2N.1	AT1G15880	BniB06g041280.2N.1	BniB03g026540.2N.1	BniB03g006540.2N.1
24	BniHAT1	B3	18945587	18944941	90.788	673	0	intergenic
25	BniHAT1	B3	50638938	50639588	90	680	0	2kb_flank	BniB03p000182.2N.1
26	BniHAT1	B3	40995268	40994611	89.513	677	0	intergenic
27	BniHAT1	B3	29936486	29937128	89.691	679	0	1kb_flank	BniB03g055420.2N.1
28	BniHAT1	B3	53689355	53690051	88.778	704	0	1kb_flank	BniB03g069090.2N.1
29	BniHAT1	B3	23131486	23130818	88.937	687	0	2kb_flank	BniB03g044470.2N.1	AT1G67250	BniB03g044470.2N.1	BniB05g063320.2N.1	BniB03g042960.2N.1
30	BniHAT1	B3	23800126	23799461	88.106	681	0	1kb_flank	BniB03g045710.2N.1
31	BniHAT1	B3	12426245	12425655	90.803	598	0	intergenic
32	BniHAT1	B3	50930001	50930631	88.724	674	0	2kb_flank	BniB03g066470.2N.1
33	BniHAT1	B3	3531367	3532008	88.386	663	0	intergenic
34	BniHAT1	B3	47632153	47632828	87.428	692	0	1kb_flank	BniB03g064030.2N.1
35	BniHAT1	B3	2849605	2850235	87.852	675	0	1kb_flank	BniB03g007220.2N.1	AT1G17745			BniB03g007220.2N.1
36	BniHAT1	B3	8805169	8804521	86.478	673	0	1kb_flank	BniB03g020070.2N.1
37	BniHAT1	B3	15485855	15486457	87.844	617	0	1kb_flank	BniB03g032840.2N.1
38	BniHAT1	B3	4975389	4974802	88.552	594	0	intergenic
39	BniHAT1	B3	21600441	21601074	86.357	667	0	intergenic
40	BniHAT1	B3	20211898	20212545	85.756	681	0	1kb_flank	BniB03p000049.2N.1
41	BniHAT1	B3	21818832	21819468	85.229	677	0	1kb_flank	BniB03g042530.2N.1
42	BniHAT1	B3	7381019	7380467	86.701	579	4.16e-174	1kb_flank	BniB03g016950.2N.1	AT1G28490	BniB04g043330.2N.1	BniB03g033310.2N.1	BniB03g016950.2N.1
43	BniHAT1	B3	20391998	20392620	84.72	661	6.95e-172	1kb_flank	BniB03g040440.2N.1
44	BniHAT1	B3	26772128	26771454	81.178	696	9.32e-146	intron	BniB03g050280.2N.1
45	BniHAT1	B3	14705150	14705827	80.114	699	5.69e-133	1kb_flank	BniB03g031400.2N.1
46	BniHAT1	B3	36306330	36307011	79.915	702	9.52e-131	intergenic
47	BniHAT1	B3	15984450	15983789	79.197	697	1.62e-118	1kb_flank	BniB03g033470.2N.1	AT1G29040		BniB03g033470.2N.1
48	BniHAT1	B1	39265634	39266300	96.444	675	0	intergenic
49	BniHAT1	B1	48195054	48194384	94.109	679	0	intron	BniB01g043610.2N.1	AT3G20280	BniB01g043610.2N.1
50	BniHAT1	B1	417605	418268	93.778	675	0	intergenic
51	BniHAT1	B1	55391369	55390706	93.472	674	0	intergenic
52	BniHAT1	B1	5398271	5397607	93.058	677	0	2kb_flank	BniB01g010590.2N.1	AT2G33510	BniB01g010590.2N.1	BniB06g022780.2N.1	BniB08g021220.2N.1
53	BniHAT1	B1	20940121	20940785	93.058	677	0	1kb_flank	BniB01g030430.2N.1
54	BniHAT1	B1	4521674	4522336	92.784	679	0	1kb_flank	BniB01g008820.2N.1	AT2G35730	BniB01g008820.2N.1
55	BniHAT1	B1	10581676	10582359	92.274	686	0	2kb_flank	BniB01g018680.2N.1
56	BniHAT1	B1	41718970	41719629	92.741	675	0	1kb_flank	BniB01g036820.2N.1	AT3G24340	BniB01g036820.2N.1		BniB03g025560.2N.1
57	BniHAT1	B1	1854702	1854038	92.047	679	0	1kb_flank	BniB01g003690.2N.1	AT2G42080	BniB01g003690.2N.1	BniB06g001270.2N.1
58	BniHAT1	B1	44293268	44292599	91.605	679	0	intergenic
59	BniHAT1	B1	45623711	45623050	91.753	679	0	intergenic
60	BniHAT1	B1	41191915	41192566	91.605	679	0	2kb_flank	BniB01g036370.2N.1
61	BniHAT1	B1	9221413	9220738	91.043	681	0	1kb_flank	BniB01g016660.2N.1
62	BniHAT1	B1	42005814	42005146	91.202	682	0	intergenic
63	BniHAT1	B1	8407996	8407340	91.003	678	0	1kb_flank	BniB01g015420.2N.1	AT2G28510	BniB01g015420.2N.1
64	BniHAT1	B1	53875422	53876082	90.909	682	0	1kb_flank	BniB01g054230.2N.1	AT3G10780	BniB01g054230.2N.1	BniB07g057370.2N.1	BniB07g024970.2N.1
65	BniHAT1	B1	6524572	6523895	90.483	683	0	intron	BniB01g012750.2N.1
66	BniHAT1	B1	38043586	38042958	92.453	636	0	intergenic
67	BniHAT1	B1	9044969	9045617	91.016	679	0	1kb_flank	BniB01g016390.2N.1	AT2G27510	BniB01g016390.2N.1	BniB06g016470.2N.1	BniB08g031900.2N.1
68	BniHAT1	B1	7567158	7566496	90.63	683	0	intergenic
69	BniHAT1	B1	5827791	5827152	90.909	671	0	intron	BniB01g011440.2N.1	AT2G32680	BniB01g011510.2N.1	BniB06g021780.2N.1	BniB08g020540.2N.1
70	BniHAT1	B1	4794829	4795476	90.519	675	0	1kb_flank	BniB01g009380.2N.1
71	BniHAT1	B1	45571526	45572106	93.232	591	0	2kb_flank	BniB01g040410.2N.1	AT3G22250	BniB01g040410.2N.1	BniB07g049390.2N.1
72	BniHAT1	B1	51432809	51433464	90.133	679	0	1kb_flank	BniB01g049160.2N.1	AT3G15710	BniB01g049160.2N.1	BniB07g053990.2N.1
73	BniHAT1	B1	21190754	21190103	90.176	682	0	intergenic
74	BniHAT1	B1	6125314	6124648	89.736	682	0	2kb_flank	BniB01g012010.2N.1
75	BniHAT1	B1	51119424	51118758	89.691	679	0	intergenic
76	BniHAT1	B1	8061591	8060923	89.312	683	0	intron	BniB01g014940.2N.1	AT2G28950	BniB01g014940.2N.1	BniB06g018110.2N.1
77	BniHAT1	B1	2886937	2886242	88.604	702	0	1kb_flank	BniB01g005800.2N.1	AT2G39350	BniB01g005800.2N.1	BniB06g005510.2N.1
78	BniHAT1	B1	48573441	48572797	89.381	678	0	1kb_flank	BniB01p000185.2N.1
79	BniHAT1	B1	13745344	13744781	92.388	578	0	intergenic
80	BniHAT1	B1	5462754	5463297	92.35	549	0	intron	BniB01g010740.2N.1	AT2G33385	BniB01g010740.2N.1	BniB06g022680.2N.1
81	BniHAT1	B1	53002268	53001698	91.003	578	0	intergenic
82	BniHAT1	B1	4366891	4366225	87.645	688	0	2kb_flank	BniB01g008450.2N.1	AT2G35940	BniB01g008450.2N.1	BniB06g008200.2N.1	BniB08g022650.2N.1
83	BniHAT1	B1	6859647	6860332	87.143	700	0	1kb_flank	BniB01g013180.2N.1	AT2G30980	BniB01g013180.2N.1
84	BniHAT1	B1	54299061	54299716	87.001	677	0	1kb_flank	BniB01g055190.2N.1
85	BniHAT1	B1	54957131	54956582	88.928	569	0	2kb_flank	BniB01g056630.2N.1
86	BniHAT1	B1	3864431	3865064	85.229	677	0	intergenic
87	BniHAT1	B1	45270634	45270002	85.263	665	0	1kb_flank	BniB01g039960.2N.1
88	BniHAT1	B1	47245424	47244780	84.786	677	0	intron	BniB01g042190.2N.1	AT3G21240	BniB01g042190.2N.1	BniB07g050000.2N.1	BniB07g031820.2N.1
89	BniHAT1	B1	21774300	21774855	86.678	578	1.16e-174	intergenic
90	BniHAT1	B1	39433763	39433212	86.712	587	6.95e-172	intergenic
91	BniHAT1	B1	54298751	54298079	81.295	695	7.2e-147	2kb_flank	BniB01g055190.2N.1
92	BniHAT1	B1	49998377	49997703	80.516	698	2.03e-137	1kb_flank	BniB01g046680.2N.1	AT3G17980	BniB01g046680.2N.1		BniB07g029810.2N.1
93	BniHAT1	B1	17918598	17919272	80.172	696	1.58e-133	intergenic
94	BniHAT1	B7	57499696	57500365	94.815	675	0	1kb_flank	BniB07g061540.2N.1
95	BniHAT1	B7	56230305	56230970	94.51	674	0	1kb_flank	BniB07g058820.2N.1	AT3G07890	BniB01g056120.2N.1	BniB07g058820.2N.1	BniB03g023750.2N.1
96	BniHAT1	B7	51184858	51184194	94.362	674	0	2kb_flank	BniB07g048420.2N.1
97	BniHAT1	B7	48833759	48834424	93.926	675	0	1kb_flank	BniB07g044430.2N.1
98	BniHAT1	B7	46198989	46199654	93.63	675	0	1kb_flank	BniB07g039310.2N.1
99	BniHAT1	B7	49206165	49205500	93.343	676	0	intergenic
100	BniHAT1	B7	24965122	24964458	93.205	677	0	intergenic
101	BniHAT1	B7	9862832	9863501	92.784	679	0	intergenic
102	BniHAT1	B7	45154099	45154761	92.941	680	0	1kb_flank	BniB07g037390.2N.1	AT5G48470	BniB02g069570.2N.1		BniB07g037390.2N.1
103	BniHAT1	B7	37213230	37212576	93.243	666	0	intergenic
104	BniHAT1	B7	1718090	1717422	92.614	677	0	1kb_flank	BniB07g001690.2N.1
105	BniHAT1	B7	53121467	53122153	91.379	696	0	1kb_flank	BniB07g051920.2N.1	AT3G18590	BniB01g045910.2N.1	BniB07g051920.2N.1	BniB07g030020.2N.1
106	BniHAT1	B7	39090502	39089842	91.593	678	0	intergenic
107	BniHAT1	B7	38842769	38843424	91.556	675	0	1kb_flank	BniB07g026840.2N.1	AT3G13235		BniB07g055720.2N.1	BniB07g026840.2N.1
108	BniHAT1	B7	43809531	43808865	91.016	679	0	intergenic
109	BniHAT1	B7	44446419	44447080	91.369	672	0	intergenic
110	BniHAT1	B7	35137682	35138344	90.667	675	0	1kb_flank	BniB07g021670.2N.1	AT4G16008			BniB07g021670.2N.1
111	BniHAT1	B7	1453596	1452901	90.213	705	0	intergenic
112	BniHAT1	B7	57555022	57555695	89.898	683	0	1kb_flank	BniB07g061600.2N.1	AT3G01150	BniB01g060810.2N.1	BniB07g061600.2N.1
113	BniHAT1	B7	4396321	4396962	90.074	675	0	2kb_flank	BniB07g005180.2N.1
114	BniHAT1	B7	55159061	55158406	89.676	678	0	1kb_flank	BniB07g056210.2N.1	AT3G12620	BniB01g052460.2N.1	BniB07g056210.2N.1
115	BniHAT1	B7	46914298	46913628	89.197	685	0	intergenic
116	BniHAT1	B7	52831904	52831265	89.63	675	0	2kb_flank	BniB07g051290.2N.1	AT3G19390	BniB01g044860.2N.1	BniB07g051290.2N.1
117	BniHAT1	B7	57492960	57492298	88.905	676	0	2kb_flank	BniB07g061530.2N.1
118	BniHAT1	B7	43035409	43036082	88.261	690	0	1kb_flank	BniB07g033620.2N.1
119	BniHAT1	B7	13102955	13102285	88.192	686	0	intron	BniB07g011510.2N.1
120	BniHAT1	B7	48673055	48672407	88.201	678	0	1kb_flank	BniB07g044070.2N.1	AT5G66800	BniB06g015250.2N.1	BniB07g044070.2N.1
121	BniHAT1	B7	43591194	43590550	87.059	680	0	1kb_flank	BniB07g034820.2N.1
122	BniHAT1	B7	33469985	33469413	89.057	594	0	1kb_flank	BniB07g020270.2N.1	AT4G14615			BniB07g020270.2N.1
123	BniHAT1	B7	46818318	46817725	87.399	619	0	1kb_flank	BniB07g040510.2N.1	AT5G23810			BniB07g040510.2N.1
124	BniHAT1	B7	33666181	33665557	84.615	676	6.91e-177	1kb_flank	BniB07g020540.2N.1	AT4G14950	BniB05g021150.2N.1	BniB06g058630.2N.1	BniB07g020540.2N.1
125	BniHAT1	B7	39886140	39885464	81.062	697	1.21e-144	2kb_flank	BniB07g028530.2N.1	AT3G15880		BniB07g053910.2N.1	BniB07g028530.2N.1
126	BniHAT1	B7	51003533	51004200	80.842	689	7.26e-142	intron	BniB07g048140.2N.1	AT3G23840	BniB01g037700.2N.1	BniB07g048140.2N.1
127	BniHAT1	B7	56547854	56547182	80.519	693	2.03e-137	intergenic
128	BniHAT1	B7	54916597	54915921	80.401	699	9.45e-136	1kb_flank	BniB07g055740.2N.1	AT3G13225		BniB07g055740.2N.1
129	BniHAT1	B7	31918238	31917559	80.342	702	3.4e-135	intergenic
130	BniHAT1	B7	50001871	50001195	80.114	699	5.69e-133	2kb_flank	BniB07g046450.2N.1
131	BniHAT1	B7	37553460	37554147	80.168	716	9.52e-131	intergenic
132	BniHAT1	B7	29640641	29641267	79.134	647	2.1e-112	intergenic
133	BniHAT1	B5	41069845	41070517	94.698	679	0	intergenic
134	BniHAT1	B5	55992469	55993134	94.815	675	0	intergenic
135	BniHAT1	B5	4204619	4205284	93.926	675	0	1kb_flank	BniB05g008530.2N.1	AT4G29010	BniB05g008530.2N.1	BniB02g083870.2N.1	BniB03g011550.2N.1
136	BniHAT1	B5	7035711	7036375	93.63	675	0	1kb_flank	BniB05g014860.2N.1
137	BniHAT1	B5	59747399	59746730	93.373	679	0	intergenic
138	BniHAT1	B5	64438726	64438062	93.333	675	0	1kb_flank	BniB05g070150.2N.1
139	BniHAT1	B5	15949787	15950452	92.899	676	0	intron	BniB05g032000.2N.1	AT5G52300		BniB08g017380.2N.1	BniB05g032000.2N.1
140	BniHAT1	B5	13383363	13382702	92.868	673	0	intergenic
141	BniHAT1	B5	67486388	67485726	92.33	678	0	2kb_flank	BniB05g074520.2N.1
142	BniHAT1	B5	26529321	26529991	92.444	675	0	intergenic
143	BniHAT1	B5	26053095	26053769	91.971	685	0	intergenic
144	BniHAT1	B5	59151362	59152024	92.194	679	0	1kb_flank	BniB05g063840.2N.1	AT1G67340	BniB03g044580.2N.1	BniB05g063840.2N.1	BniB03g042840.2N.1
145	BniHAT1	B5	19028228	19028894	92.094	683	0	1kb_flank	BniB05g036490.2N.1	AT5G56930	BniB02g035980.2N.1		BniB05g036490.2N.1
146	BniHAT1	B5	6766221	6765543	91.777	681	0	intron	BniB05g014230.2N.1	AT4G23190	BniB05g013980.2N.1
147	BniHAT1	B5	22883161	22882462	91.441	701	0	2kb_flank	BniB05p000067.2N.1
148	BniHAT1	B5	22900287	22899598	91.655	695	0	intergenic
149	BniHAT1	B5	14742945	14743618	91.74	678	0	intergenic
150	BniHAT1	B5	65184985	65185596	93.73	622	0	2kb_flank	BniB05g071300.2N.1
151	BniHAT1	B5	61707795	61707165	92.724	646	0	intergenic
152	BniHAT1	B5	65046942	65047610	91.324	680	0	intron	BniB05g071160.2N.1	AT1G74180	BniB03g052690.2N.1	BniB05g071160.2N.1	BniB06g047810.2N.1
153	BniHAT1	B5	15573009	15572342	90.99	677	0	2kb_flank	BniB05g031420.2N.1	AT5G01090			BniB05g031420.2N.1
154	BniHAT1	B5	68165899	68165244	91.163	679	0	intron	BniB05g075740.2N.1
155	BniHAT1	B5	7617776	7618460	90.247	687	0	intron	BniB05g016070.2N.1	AT4G20910	BniB05g016070.2N.1
156	BniHAT1	B5	8009294	8009915	92.138	636	0	1kb_flank	BniB05g016740.2N.1	AT4G19680	BniB05g016740.2N.1	BniB02g071260.2N.1
157	BniHAT1	B5	52026358	52025703	90.735	680	0	intergenic
158	BniHAT1	B5	43839604	43840276	90.029	682	0	intergenic
159	BniHAT1	B5	15622266	15621619	90.547	677	0	intergenic
160	BniHAT1	B5	13053810	13054465	90.351	684	0	1kb_flank	BniB05g026620.2N.1	AT5G10550			BniB05g026620.2N.1
161	BniHAT1	B5	20310801	20310124	89.766	684	0	1kb_flank	BniB05g038320.2N.1	AT5G58850		BniB08g012940.2N.1	BniB05g038320.2N.1
162	BniHAT1	B5	465749	466411	89.941	676	0	1kb_flank	BniB05g000860.2N.1	AT4G38470	BniB05g000860.2N.1		BniB03g015800.2N.1
163	BniHAT1	B5	66403912	66403244	89.883	682	0	intergenic
164	BniHAT1	B5	2306875	2306216	89.956	687	0	1kb_flank	BniB05g004320.2N.1	AT4G33870	BniB05g004320.2N.1
165	BniHAT1	B5	9114457	9115113	89.805	667	0	intergenic
166	BniHAT1	B5	15257859	15258520	89.513	677	0	1kb_flank	BniB05g030840.2N.1	AT5G03110			BniB05g030840.2N.1
167	BniHAT1	B5	8314443	8313805	89.778	675	0	2kb_flank	BniB05g017360.2N.1	AT4G19020	BniB05g017360.2N.1
168	BniHAT1	B5	16515782	16515099	88.777	695	0	intergenic
169	BniHAT1	B5	3593349	3592705	89.396	679	0	2kb_flank	BniB05g007290.2N.1	AT4G30440	BniB05g007290.2N.1	BniB02g084720.2N.1
170	BniHAT1	B5	57309146	57308499	89.035	684	0	1kb_flank	BniB05g061920.2N.1
171	BniHAT1	B5	24294242	24293656	90.468	598	0	1kb_flank	BniB05g043870.2N.1
172	BniHAT1	B5	18096709	18097303	89.583	624	0	intergenic
173	BniHAT1	B5	15087395	15088071	85.816	705	0	1kb_flank	BniB05g030480.2N.1	AT5G03580		BniB08g001180.2N.1	BniB05g030480.2N.1
174	BniHAT1	B5	19406873	19407414	88.608	553	0	1kb_flank	BniB05g036880.2N.1	AT5G57300	BniB02g036660.2N.1	BniB08g013880.2N.1	BniB05g036880.2N.1
175	BniHAT1	B5	55706272	55705692	86.795	621	0	1kb_flank	BniB05g060200.2N.1	AT5G51230	BniB02g028470.2N.1	BniB08g017890.2N.1	BniB05g060200.2N.1
176	BniHAT1	B5	18844029	18844700	80.808	693	2.61e-141	2kb_flank	BniB05g036230.2N.1	AT5G56520	BniB02g035500.2N.1	BniB08g014510.2N.1	BniB05g036230.2N.1
177	BniHAT1	B5	26956033	26955360	80.747	696	3.38e-140	intergenic
178	BniHAT1	B5	61302476	61303149	80.603	696	1.57e-138	1kb_flank	BniB05g066380.2N.1
179	BniHAT1	B5	65910652	65911324	80.548	694	1.57e-138	2kb_flank	BniB05g072370.2N.1
180	BniHAT1	B5	23692939	23692262	80.258	699	1.22e-134	1kb_flank	BniB05g043150.2N.1	AT5G20270			BniB05g043150.2N.1
181	BniHAT1	B5	12886457	12885783	80.314	701	4.4e-134	intergenic
182	BniHAT1	B5	59003660	59002994	79.513	698	1.6e-123	intergenic
183	BniHAT1	B5	20131606	20132250	79.42	690	4.49e-119	1kb_flank	BniB05g038080.2N.1
184	BniHAT1	B5	64122428	64123069	79.549	665	4.49e-119	intron	BniB05g069640.2N.1	AT1G72250	BniB03g050430.2N.1	BniB05g069640.2N.1
185	BniHAT1	B6	4611535	4612208	94.535	677	0	intergenic
186	BniHAT1	B6	8730664	8730000	94.222	675	0	intergenic
187	BniHAT1	B6	9877227	9877897	93.658	678	0	intergenic
188	BniHAT1	B6	55074534	55073865	93.215	678	0	1kb_flank	BniB06g057720.2N.1
189	BniHAT1	B6	1126719	1127383	93.185	675	0	intron	BniB06g002330.2N.1	AT2G43620		BniB06g002330.2N.1	BniB08g028510.2N.1
190	BniHAT1	B6	3093139	3093804	93.047	676	0	2kb_flank	BniB06g006230.2N.1
191	BniHAT1	B6	3312082	3311409	92.847	685	0	1kb_flank	BniB06g006680.2N.1
192	BniHAT1	B6	15125051	15124398	92.296	675	0	1kb_flank	BniB06g025230.2N.1	AT3G43920			BniB06g025230.2N.1
193	BniHAT1	B6	56121251	56120589	92.16	676	0	1kb_flank	BniB06g059670.2N.1
194	BniHAT1	B6	13681787	13682483	91.441	701	0	intergenic
195	BniHAT1	B6	13947929	13948608	91.654	683	0	intergenic
196	BniHAT1	B6	54264200	54264859	92	675	0	2kb_flank	BniB06g056220.2N.1
197	BniHAT1	B6	12527421	12528080	91.753	679	0	2kb_flank	BniB06g021860.2N.1	AT2G32730	BniB01g011380.2N.1	BniB06g021860.2N.1	BniB08g020590.2N.1
198	BniHAT1	B6	9992573	9991958	93.579	623	0	2kb_flank	BniB06g018110.2N.1
199	BniHAT1	B6	4683481	4684130	91.568	676	0	intron	BniB06g009350.2N.1	AT2G34520	BniB01g009730.2N.1	BniB06g009350.2N.1
200	BniHAT1	B6	6213818	6213167	90.976	676	0	1kb_flank	BniB06g012240.2N.1	AT5G64020	BniB06g012240.2N.1		BniB04g001610.2N.1
201	BniHAT1	B6	47244046	47243364	90.102	687	0	1kb_flank	BniB06g043230.2N.1	AT1G07520	BniB06g043230.2N.1	BniB02g003620.2N.1
202	BniHAT1	B6	50882220	50882872	90.251	677	0	2kb_flank	BniB06g049450.2N.1
203	BniHAT1	B6	55199821	55199134	88.649	696	0	1kb_flank	BniB06p000245.2N.1
204	BniHAT1	B6	6537394	6536758	89.318	674	0	intergenic
205	BniHAT1	B6	13151327	13152002	88.406	690	0	1kb_flank	BniB06g022600.2N.1	AT2G33330		BniB06g022600.2N.1
206	BniHAT1	B6	34313235	34312577	88.679	689	0	intergenic
207	BniHAT1	B6	17210372	17211065	87.857	700	0	2kb_flank	BniB06g027600.2N.1
208	BniHAT1	B6	3501862	3501205	88.053	678	0	intergenic
209	BniHAT1	B6	51895071	51895759	87.069	696	0	1kb_flank	BniB06g051240.2N.1
210	BniHAT1	B6	15935147	15934568	89.684	601	0	1kb_flank	BniB06g026340.2N.1	AT1G55080		BniB06g026340.2N.1	BniB07g001570.2N.1
211	BniHAT1	B6	56438126	56437468	87.04	679	0	1kb_flank	BniB06g060250.2N.1
212	BniHAT1	B6	41336230	41336881	87.097	682	0	1kb_flank	BniB06g036580.2N.1
213	BniHAT1	B6	52482856	52483428	89.845	581	0	intron	BniB06g052480.2N.1	AT3G62600	BniB08g076570.2N.1	BniB06g061530.2N.1	BniB06g052480.2N.1
214	BniHAT1	B6	41710574	41709950	87.576	660	0	1kb_flank	BniB06g036780.2N.1
215	BniHAT1	B6	56399293	56399863	89.86	572	0	2kb_flank	BniB06g060210.2N.1
216	BniHAT1	B6	58151626	58152182	89.142	571	0	intergenic
217	BniHAT1	B6	56534579	56534031	88.441	571	0	1kb_flank	BniB06g060440.2N.1	AT5G38470	BniB01g029150.2N.1	BniB06g060440.2N.1
218	BniHAT1	B6	16565936	16565262	81.439	695	4.31e-149	intergenic
219	BniHAT1	B6	4627724	4627050	80.918	697	2.02e-142	intergenic
220	BniHAT1	B6	59058806	59058134	80.692	694	3.38e-140	1kb_flank	BniB06g065600.2N.1	AT3G54180		BniB06g065600.2N.1
221	BniHAT1	B6	19432660	19433334	80.344	697	9.45e-136	intergenic
222	BniHAT1	B6	57587440	57588115	80.372	698	9.45e-136	1kb_flank	BniB06g062590.2N.1	AT3G60370		BniB06g062590.2N.1
223	BniHAT1	B6	10268138	10267469	80.202	692	5.69e-133	intron	BniB06g018370.2N.1
224	BniHAT1	B6	47346335	47347000	79.627	697	1.24e-124	intron	BniB06g043490.2N.1	AT1G07180	BniB06g043490.2N.1		BniB03g002130.2N.1
225	BniHAT1	B6	13528321	13528916	81.04	654	5.77e-123	intergenic
226	BniHAT1	B6	46717388	46718058	79.399	699	5.77e-123	1kb_flank	BniB06g042370.2N.1
227	BniHAT1	B6	7076689	7076029	79.539	694	2.08e-122	2kb_flank	BniB06g013890.2N.1	AT5G65600	BniB06g013890.2N.1
228	BniHAT1	B8	15787926	15788590	94.222	675	0	intergenic
229	BniHAT1	B8	23494020	23494666	94.205	673	0	1kb_flank	BniB08g038650.2N.1
230	BniHAT1	B8	57182744	57183407	93.778	675	0	intergenic
231	BniHAT1	B8	13729044	13729710	93.491	676	0	intron	BniB08g026380.2N.1	AT2G40760	BniB01g004650.2N.1		BniB08g026380.2N.1
232	BniHAT1	B8	64632329	64632993	93.481	675	0	1kb_flank	BniB08g072100.2N.1	AT3G57400	BniB08g072100.2N.1	BniB06g063950.2N.1	BniB06g055860.2N.1
233	BniHAT1	B8	376641	377303	93.323	674	0	2kb_flank	BniB08g000720.2N.1	AT5G02480	BniB02g057630.2N.1	BniB08g000720.2N.1
234	BniHAT1	B8	60019676	60019013	93.333	675	0	intergenic
235	BniHAT1	B8	11749746	11750406	93.353	677	0	2kb_flank	BniB08p000026.2N.1
236	BniHAT1	B8	60626419	60625754	93.195	676	0	intron	BniB08g064750.2N.1	AT3G50840	BniB08g064750.2N.1
237	BniHAT1	B8	52215977	52215311	93.068	678	0	intron	BniB08g056680.2N.1	AT3G43800	BniB08g056680.2N.1
238	BniHAT1	B8	21236338	21236997	93.037	675	0	intergenic
239	BniHAT1	B8	62460102	62460781	92.555	685	0	intergenic
240	BniHAT1	B8	56426773	56427440	92.489	679	0	1kb_flank	BniB08g059460.2N.1
241	BniHAT1	B8	14106103	14106760	92.467	677	0	2kb_flank	BniB08g026950.2N.1	AT2G41330	BniB01g004170.2N.1		BniB08g026950.2N.1
242	BniHAT1	B8	2655612	2654957	92.456	676	0	2kb_flank	BniB08g005430.2N.1
243	BniHAT1	B8	14364052	14363384	92.059	680	0	2kb_flank	BniB08g027470.2N.1	AT2G42380		BniB06g001480.2N.1	BniB08g027470.2N.1
244	BniHAT1	B8	27961144	27960488	92.308	676	0	1kb_flank	BniB08g044500.2N.1
245	BniHAT1	B8	65098310	65097649	92.171	677	0	1kb_flank	BniB08g073120.2N.1	AT3G58570	BniB08g073120.2N.1		BniB06g054820.2N.1
246	BniHAT1	B8	60857677	60858340	92.105	684	0	2kb_flank	BniB08g065190.2N.1	AT3G51260	BniB08g065190.2N.1		BniB02g074770.2N.1
247	BniHAT1	B8	6762291	6761622	91.935	682	0	2kb_flank	BniB08g014740.2N.1	AT5G56240	BniB02g035070.2N.1	BniB08g014740.2N.1	BniB05g035900.2N.1
248	BniHAT1	B8	5774265	5774919	92.136	674	0	1kb_flank	BniB08g012450.2N.1
249	BniHAT1	B8	38629284	38628601	91.499	694	0	intergenic
250	BniHAT1	B8	17801477	17802150	91.533	685	0	intron	BniB08g032450.2N.1	AT2G26910	BniB01g016880.2N.1		BniB08g032450.2N.1
251	BniHAT1	B8	28469802	28469118	91.079	695	0	intron	BniB08g045310.2N.1	AT4G02650	BniB08g045310.2N.1
252	BniHAT1	B8	3707891	3707214	90.988	688	0	2kb_flank	BniB08g007730.2N.1	AT5G16190	BniB02g046550.2N.1	BniB08g007730.2N.1
253	BniHAT1	B8	35635024	35635700	90.63	683	0	1kb_flank	BniB08g052260.2N.1
254	BniHAT1	B8	4561572	4562228	90.882	680	0	1kb_flank	BniB08g009810.2N.1	AT5G19430		BniB08g009810.2N.1
255	BniHAT1	B8	5843946	5843273	90.58	690	0	intron	BniB08g012670.2N.1	AT5G59320	BniB02g038890.2N.1	BniB08g012670.2N.1	BniB05g038780.2N.1
256	BniHAT1	B8	1349286	1348634	90.842	677	0	1kb_flank	BniB08g002730.2N.1
257	BniHAT1	B8	28748217	28748873	90.708	678	0	2kb_flank	BniB08g045670.2N.1	AT4G03000	BniB08g045670.2N.1
258	BniHAT1	B8	22901813	22901166	90.667	675	0	intergenic
259	BniHAT1	B8	65025643	65024997	90.667	675	0	2kb_flank	BniB08g073000.2N.1	AT3G58430	BniB08g073000.2N.1		BniB06g054940.2N.1
260	BniHAT1	B8	52485816	52486479	90.251	677	0	1kb_flank	BniB08g057000.2N.1
261	BniHAT1	B8	62153111	62152463	90.574	679	0	1kb_flank	BniB08g067270.2N.1
262	BniHAT1	B8	4415542	4416205	89.985	679	0	1kb_flank	BniB08g009470.2N.1	AT5G18710	BniB02g043990.2N.1	BniB08g009470.2N.1
263	BniHAT1	B8	23120860	23120185	89.736	682	0	intergenic
264	BniHAT1	B8	62913774	62913115	90.059	674	0	2kb_flank	BniB08g068820.2N.1
265	BniHAT1	B8	66499791	66500441	90.074	675	0	intergenic
266	BniHAT1	B8	15862347	15862995	90.133	679	0	2kb_flank	BniB08g030100.2N.1
267	BniHAT1	B8	13621056	13620402	89.838	679	0	1kb_flank	BniB08g026180.2N.1	AT2G40480	BniB01g004830.2N.1		BniB08g026180.2N.1
268	BniHAT1	B8	19519774	19520440	89.396	679	0	1kb_flank	BniB08g034400.2N.1
269	BniHAT1	B8	172779	172106	89.181	684	0	1kb_flank	BniB08g000380.2N.1	AT5G01260		BniB08g000380.2N.1
270	BniHAT1	B8	34720135	34719482	89.427	681	0	intergenic
271	BniHAT1	B8	27041089	27040414	88.841	690	0	intergenic
272	BniHAT1	B8	35314332	35315010	88.857	700	0	1kb_flank	BniB08g051780.2N.1	AT4G10760	BniB08g051780.2N.1
273	BniHAT1	B8	24527223	24526539	88.362	696	0	1kb_flank	BniB08g039930.2N.1
274	BniHAT1	B8	13317175	13316525	88.707	673	0	1kb_flank	BniB08g025760.2N.1
275	BniHAT1	B8	12310160	12310743	90.671	611	0	intron	BniB08g024220.2N.1	AT2G38180	BniB01g006680.2N.1		BniB08g024220.2N.1
276	BniHAT1	B8	32326497	32325837	88.053	678	0	1kb_flank	BniB08g049160.2N.1	AT4G12120	BniB08g049160.2N.1	BniB08g037080.2N.1
277	BniHAT1	B8	64501108	64501645	92.714	549	0	1kb_flank	BniB08g071760.2N.1	AT3G57040	BniB08g071760.2N.1	BniB06g064070.2N.1	BniB06g056090.2N.1
278	BniHAT1	B8	29229723	29229154	91.304	575	0	intergenic
279	BniHAT1	B8	11138396	11139007	89.44	625	0	1kb_flank	BniB08g022400.2N.1	AT2G35680	BniB01g008870.2N.1	BniB06g008260.2N.1	BniB08g022400.2N.1
280	BniHAT1	B8	14095934	14095408	92.379	538	0	1kb_flank	BniB08g026940.2N.1
281	BniHAT1	B8	15697700	15698339	87.74	677	0	2kb_flank	BniB08g029750.2N.1
282	BniHAT1	B8	32442660	32443268	89.286	616	0	2kb_flank	BniB08g049370.2N.1
283	BniHAT1	B8	56877604	56877037	90.609	575	0	1kb_flank	BniB08g060030.2N.1	AT3G47295	BniB08g060030.2N.1
284	BniHAT1	B8	24876716	24876076	87.611	678	0	intergenic
285	BniHAT1	B8	62919046	62918510	91.56	545	0	2kb_flank	BniB08g068820.2N.1
286	BniHAT1	B8	54012339	54012995	87.225	681	0	intergenic
287	BniHAT1	B8	7815372	7814814	90.345	580	0	intergenic
288	BniHAT1	B8	9195739	9196397	86.541	691	0	2kb_flank	BniB08g019130.2N.1	AT2G30740		BniB06g019740.2N.1	BniB08g019130.2N.1
289	BniHAT1	B8	56553931	56553256	86.182	702	0	intergenic
290	BniHAT1	B8	12126691	12126128	89.119	579	0	intron	BniB08g024010.2N.1	AT2G37790		BniB06g006730.2N.1	BniB08g024010.2N.1
291	BniHAT1	B8	25594527	25593886	86.176	680	0	intergenic
292	BniHAT1	B8	52197003	52197537	89.964	548	0	intergenic
293	BniHAT1	B8	13212624	13211994	86.708	647	0	2kb_flank	BniB08g025590.2N.1
294	BniHAT1	B8	23564955	23564358	87.521	601	0	intergenic
295	BniHAT1	B8	58170559	58171201	85.106	658	4.13e-179	intergenic
296	BniHAT1	B8	27358680	27359260	84.502	613	2.55e-156	1kb_flank	BniB08g043900.2N.1
297	BniHAT1	B8	9860246	9859574	81.439	695	1.55e-148	intron	BniB08g020250.2N.1
298	BniHAT1	B8	61275793	61276465	81.385	693	1.55e-148	1kb_flank	BniB08g065970.2N.1	AT3G51895	BniB08g065970.2N.1		BniB02g074420.2N.1
299	BniHAT1	B8	21588680	21589238	83.729	590	2.61e-141	1kb_flank	BniB08g036520.2N.1
300	BniHAT1	B8	36273803	36273127	80.83	699	2.61e-141	1kb_flank	BniB08g052480.2N.1
301	BniHAT1	B8	21710624	21711286	80.692	694	2.03e-137	intergenic
302	BniHAT1	B8	54190133	54190801	80.576	695	2.03e-137	1kb_flank	BniB08g057690.2N.1	AT3G44680	BniB08g057690.2N.1
303	BniHAT1	B8	66110857	66111531	80.46	696	2.03e-137	2kb_flank	BniB08g074990.2N.1	AT3G60680	BniB08g074990.2N.1	BniB06g062440.2N.1
304	BniHAT1	B8	46518595	46519264	80.259	694	5.69e-133	intergenic
305	BniHAT1	B8	22083362	22084030	80.201	697	2.05e-132	1kb_flank	BniB08g037150.2N.1	AT4G12240		BniB08g037150.2N.1
306	BniHAT1	B8	54522800	54522125	79.714	700	2.06e-127	intergenic
307	BniHAT1	B8	11962294	11961647	79.36	688	1.25e-119	2kb_flank	BniB08g023760.2N.1	AT2G37410		BniB06g007130.2N.1	BniB08g023760.2N.1
308	BniHAT1	B8	7819961	7820628	79.023	696	1.62e-118	1kb_flank	BniB08g016760.2N.1
309	BniHAT1	B8	57342486	57343142	78.788	693	4.52e-114	1kb_flank	BniB08g060520.2N.1	AT3G47640	BniB08g060520.2N.1	BniB05g051940.2N.1	BniB06g024340.2N.1
310	BniHAT1	B8	24869343	24869945	78.807	637	7.68e-102	2kb_flank	BniB08g040320.2N.1
311	BniHAT1	B2	4779257	4778595	93.917	674	0	intergenic
312	BniHAT1	B2	9439941	9440605	93.787	676	0	2kb_flank	BniB02g015360.2N.1
313	BniHAT1	B2	45827968	45828635	93.658	678	0	1kb_flank	BniB02g038980.2N.1	AT5G59370	BniB02g038980.2N.1	BniB08g012650.2N.1	BniB05g038880.2N.1
314	BniHAT1	B2	47661229	47660566	93.481	675	0	2kb_flank	BniB02g042140.2N.1	AT5G20730	BniB02g042140.2N.1
315	BniHAT1	B2	63188748	63189412	93.037	675	0	intergenic
316	BniHAT1	B2	25173300	25173968	92.91	677	0	2kb_flank	BniB02g025290.2N.1
317	BniHAT1	B2	15080304	15079651	93.047	676	0	intergenic
318	BniHAT1	B2	70340726	70340064	92.183	678	0	2kb_flank	BniB02g088660.2N.1	AT4G37640		BniB02g088660.2N.1	BniB03g014370.2N.1
319	BniHAT1	B2	62842620	62841961	92.183	678	0	1kb_flank	BniB02g072270.2N.1	AT4G18010	BniB05g018360.2N.1	BniB02g072270.2N.1
320	BniHAT1	B2	3024568	3023902	91.753	679	0	2kb_flank	BniB02g005880.2N.1	AT1G10840	BniB04g028790.2N.1	BniB02g005880.2N.1	BniB03g004150.2N.1
321	BniHAT1	B2	56251137	56251815	91.317	691	0	2kb_flank	BniB02g059940.2N.1	AT1G59590	BniB04g019620.2N.1	BniB02g059940.2N.1	BniB07g045670.2N.1
322	BniHAT1	B2	4281459	4282119	91.445	678	0	intron	BniB02g007950.2N.1	AT1G13120	BniB04g027750.2N.1	BniB02g007950.2N.1
323	BniHAT1	B2	49141032	49141688	91.445	678	0	1kb_flank	BniB02g044870.2N.1	AT5G17970	BniB02g044870.2N.1		BniB05g045780.2N.1
324	BniHAT1	B2	53668812	53668154	91.445	678	0	1kb_flank	BniB02g054650.2N.1	AT5G06090	BniB02g054650.2N.1
325	BniHAT1	B2	56685850	56685197	91.458	679	0	1kb_flank	BniB02g060670.2N.1	AT5G43140	BniB02g060670.2N.1
326	BniHAT1	B2	69325275	69324611	91.215	683	0	1kb_flank	BniB02g086450.2N.1	AT4G33720	BniB05g004390.2N.1	BniB02g086450.2N.1
327	BniHAT1	B2	70369712	70370386	90.949	685	0	1kb_flank	BniB02g088760.2N.1	AT4G37720		BniB02g088760.2N.1	BniB03g014410.2N.1
328	BniHAT1	B2	14169994	14170660	91.298	678	0	2kb_flank	BniB02g020440.2N.1
329	BniHAT1	B2	46753782	46753115	90.842	677	0	1kb_flank	BniB02g040640.2N.1	AT5G60780	BniB02g040640.2N.1		BniB05g041090.2N.1
330	BniHAT1	B2	43836373	43835709	90.828	676	0	2kb_flank	BniB02g035940.2N.1	AT5G56890	BniB02g035940.2N.1		BniB05g036480.2N.1
331	BniHAT1	B2	38643749	38644418	90.547	677	0	2kb_flank	BniB02g029840.2N.1
332	BniHAT1	B2	43138111	43138771	90.547	677	0	intron	BniB02g035010.2N.1	AT5G56180	BniB02g035010.2N.1		BniB05g035850.2N.1
333	BniHAT1	B2	51848968	51849617	90.869	679	0	2kb_flank	BniB02g050650.2N.1
334	BniHAT1	B2	55333935	55334612	90.29	690	0	1kb_flank	BniB02g058580.2N.1
335	BniHAT1	B2	49681627	49680940	90.115	698	0	1kb_flank	BniB02g045900.2N.1	AT5G16840	BniB02g045900.2N.1	BniB08g008180.2N.1	BniB05g022340.2N.1
336	BniHAT1	B2	37977708	37977048	90.399	677	0	1kb_flank	BniB02g029330.2N.1	AT5G51830	BniB02g029330.2N.1	BniB08g017620.2N.1
337	BniHAT1	B2	50954792	50954149	90.828	676	0	1kb_flank	BniB02g048780.2N.1	AT5G13790	BniB02g048780.2N.1	BniB08g006490.2N.1
338	BniHAT1	B2	3634282	3633637	90.694	677	0	intron	BniB02g006850.2N.1	AT1G12150		BniB02g006850.2N.1	BniB03g004980.2N.1
339	BniHAT1	B2	44474454	44475116	90.237	676	0	intergenic
340	BniHAT1	B2	16365875	16365217	90.089	676	0	2kb_flank	BniB02g022030.2N.1
341	BniHAT1	B2	11217810	11218461	90.265	678	0	2kb_flank	BniB02g017870.2N.1	AT2G22090	BniB01g022050.2N.1	BniB02g017870.2N.1
342	BniHAT1	B2	55226544	55225980	93.565	575	0	1kb_flank	BniB02g058340.2N.1	AT3G08740	BniB01g055800.2N.1
343	BniHAT1	B2	43566897	43567545	89.985	679	0	intergenic
344	BniHAT1	B2	25672505	25671824	89.209	695	0	1kb_flank	BniB02g025490.2N.1
345	BniHAT1	B2	48099459	48100115	89.513	677	0	1kb_flank	BniB02g042810.2N.1	AT5G19910	BniB02g042810.2N.1		BniB05g043460.2N.1
346	BniHAT1	B2	41896278	41895630	89.721	681	0	intron	BniB02g032990.2N.1	AT5G54500	BniB02g032990.2N.1	BniB08g015920.2N.1	BniB05g034350.2N.1
347	BniHAT1	B2	46558317	46557664	89.605	683	0	1kb_flank	BniB02g040390.2N.1
348	BniHAT1	B2	50533619	50534257	89.778	675	0	intron	BniB02g047870.2N.1	AT5G15020	BniB02g047870.2N.1	BniB08g007140.2N.1	BniB05g023530.2N.1
349	BniHAT1	B2	61785144	61784480	88.938	678	0	1kb_flank	BniB02g070290.2N.1	AT5G49400	BniB02g070290.2N.1
350	BniHAT1	B2	43921777	43921111	88.856	682	0	intergenic
351	BniHAT1	B2	293974	293322	89.102	679	0	intron	BniB02g000490.2N.1	AT1G01370		BniB02g000490.2N.1
352	BniHAT1	B2	6729933	6730529	91.254	606	0	1kb_flank	BniB02p000029.2N.1
353	BniHAT1	B2	62828134	62828796	88.287	683	0	1kb_flank	BniB02g072260.2N.1	AT4G18020	BniB05g018350.2N.1	BniB02g072260.2N.1
354	BniHAT1	B2	57336913	57337572	87.941	680	0	intergenic
355	BniHAT1	B2	59453996	59453352	88.018	676	0	1kb_flank	BniB02g065610.2N.1
356	BniHAT1	B2	8470132	8470797	87.482	679	0	intergenic
357	BniHAT1	B2	11400787	11400231	91.176	578	0	intergenic
358	BniHAT1	B2	32752016	32752624	89.274	634	0	1kb_flank	BniB02g026950.2N.1
359	BniHAT1	B2	66904742	66904108	88.071	679	0	1kb_flank	BniB02g080810.2N.1	AT4G23840		BniB02g080810.2N.1
360	BniHAT1	B2	25815074	25815724	87.574	676	0	1kb_flank	BniB02g025650.2N.1
361	BniHAT1	B2	634779	635453	87.176	694	0	1kb_flank	BniB02g001020.2N.1	AT1G02990	BniB03g038410.2N.1	BniB02g001020.2N.1
362	BniHAT1	B2	2520744	2521276	90.642	545	0	intergenic
363	BniHAT1	B2	302294	302820	90.476	546	0	2kb_flank	BniB02g000510.2N.1	AT1G01290		BniB02g000510.2N.1
364	BniHAT1	B2	1079053	1078439	83.284	676	4.25e-159	1kb_flank	BniB02g001970.2N.1	AT1G04760		BniB02g001970.2N.1
365	BniHAT1	B2	50426282	50426804	84.806	566	5.57e-148	1kb_flank	BniB02g047600.2N.1	AT5G15265	BniB02g047600.2N.1	BniB08g007290.2N.1
366	BniHAT1	B2	51976974	51977648	81.034	696	4.34e-144	intergenic
367	BniHAT1	B2	2563155	2562481	80.747	696	9.39e-141	intron	BniB02g005140.2N.1	AT1G10050		BniB02g005140.2N.1
368	BniHAT1	B2	68003009	68002334	80.719	695	9.39e-141	intron	BniB02g083610.2N.1	AT4G28530	BniB05g008980.2N.1	BniB02g083610.2N.1	BniB03g011680.2N.1
369	BniHAT1	B2	14285070	14284408	80.46	696	4.4e-134	intergenic
370	BniHAT1	B2	55692770	55692130	79.009	686	1.26e-114	intron	BniB02g059080.2N.1	AT1G62180		BniB02g059080.2N.1
371	BniHAT1	B2	64911471	64910763	78.255	722	7.57e-112	intron	BniB02g076750.2N.1	AT5G23580	BniB02g076750.2N.1	BniB04g003240.2N.1	BniB07g040620.2N.1
372	BniHAT1	B2	70262977	70263571	79.058	616	1.65e-103	1kb_flank	BniB02g088500.2N.1	AT4G37370		BniB02g088500.2N.1	BniB03g014280.2N.1
373	BniHAT1	B2	55645551	55646248	77.531	721	1.28e-99	intergenic
374	BniHAT1	B2	47117490	47118166	76.312	705	2.2e-82	2kb_flank	BniB02g041180.2N.1
375	BniHAT1	B4	8429613	8428948	93.63	675	0	exon	BniB04g016760.2N.1	AT5G44900		BniB04g016760.2N.1
376	BniHAT1	B4	30997963	30997295	93.51	678	0	intron	BniB04g049660.2N.1	AT1G32970	BniB04g049660.2N.1
377	BniHAT1	B4	13806872	13807531	93.639	676	0	1kb_flank	BniB04g025600.2N.1	AT2G18480			BniB04g025600.2N.1
378	BniHAT1	B4	17077691	17077026	92.92	678	0	1kb_flank	BniB04g032070.2N.1	AT1G17720	BniB04g032070.2N.1	BniB03g027760.2N.1	BniB03g007210.2N.1
379	BniHAT1	B4	49403077	49402402	92.679	683	0	intergenic
380	BniHAT1	B4	8843398	8844076	92.533	683	0	intergenic
381	BniHAT1	B4	28287967	28288631	92.741	675	0	1kb_flank	BniB04g048020.2N.1
382	BniHAT1	B4	24815911	24816572	92.751	676	0	intergenic
383	BniHAT1	B4	12481233	12481899	92.604	676	0	intergenic
384	BniHAT1	B4	1162777	1163460	92.128	686	0	1kb_flank	BniB04g002390.2N.1	AT5G62200		BniB07g041440.2N.1	BniB04g002390.2N.1
385	BniHAT1	B4	44301767	44301101	92.33	678	0	2kb_flank	BniB04g053760.2N.1
386	BniHAT1	B4	13725452	13726112	92.308	676	0	2kb_flank	BniB04g025450.2N.1	AT2G18700			BniB04g025450.2N.1
387	BniHAT1	B4	10984138	10983481	92	675	0	intergenic
388	BniHAT1	B4	26861820	26861155	91.593	678	0	intergenic
389	BniHAT1	B4	24293115	24293801	91.159	690	0	1kb_flank	BniB04g043390.2N.1	AT1G28660	BniB04g043390.2N.1
390	BniHAT1	B4	27264153	27264817	91.163	679	0	1kb_flank	BniB04g046960.2N.1	AT1G31130	BniB04g046960.2N.1	BniB03g034790.2N.1	BniB07g019540.2N.1
391	BniHAT1	B4	26392750	26393405	91.298	678	0	intergenic
392	BniHAT1	B4	8635090	8635768	90.643	684	0	intergenic
393	BniHAT1	B4	1221198	1221846	91.098	674	0	1kb_flank	BniB04p000003.2N.1
394	BniHAT1	B4	15954670	15954033	91.463	656	0	2kb_flank	BniB04g029610.2N.1	AT1G10120	BniB04g029610.2N.1	BniB02g005160.2N.1	BniB03g003730.2N.1
395	BniHAT1	B4	20935145	20934492	90.869	679	0	intron	BniB04g038940.2N.1
396	BniHAT1	B4	8132338	8133001	90.56	678	0	intergenic
397	BniHAT1	B4	17340335	17341032	89.986	699	0	1kb_flank	BniB04g032580.2N.1	AT1G18080	BniB04g032580.2N.1	BniB03g027900.2N.1	BniB03g007440.2N.1
398	BniHAT1	B4	12983931	12983281	90.708	678	0	intron	BniB04g024130.2N.1	AT1G63560		BniB04g024130.2N.1
399	BniHAT1	B4	6519640	6518974	89.868	681	0	intergenic
400	BniHAT1	B4	31471128	31470547	93.322	584	0	intergenic
401	BniHAT1	B4	15086608	15087275	89.559	680	0	1kb_flank	BniB04g027770.2N.1	AT1G13150	BniB04g027770.2N.1	BniB02g008020.2N.1	BniB03g005510.2N.1
402	BniHAT1	B4	19933069	19932473	92.105	608	0	2kb_flank	BniB04g037360.2N.1
403	BniHAT1	B4	23530518	23531189	89.504	686	0	1kb_flank	BniB04g042630.2N.1
404	BniHAT1	B4	14061638	14060987	89.574	681	0	2kb_flank	BniB04g025970.2N.1	AT2G18000	BniB03g066530.2N.1		BniB04g025970.2N.1
405	BniHAT1	B4	15632912	15633553	89.66	677	0	2kb_flank	BniB04g028930.2N.1	AT1G10650	BniB04g028930.2N.1		BniB03g004060.2N.1
406	BniHAT1	B4	15974213	15974870	89.217	677	0	2kb_flank	BniB04g029640.2N.1	AT1G10030	BniB04g029640.2N.1		BniB03g003680.2N.1
407	BniHAT1	B4	24279667	24280325	89.233	678	0	1kb_flank	BniB04g043370.2N.1
408	BniHAT1	B4	11941194	11940543	89.118	680	0	1kb_flank	BniB04g022220.2N.1
409	BniHAT1	B4	1280980	1280399	91.823	587	0	intergenic
410	BniHAT1	B4	14531938	14532574	88.905	676	0	intergenic
411	BniHAT1	B4	6482347	6481670	88.047	686	0	1kb_flank	BniB04g013360.2N.1	AT5G42750			BniB04g013360.2N.1
412	BniHAT1	B4	11409097	11408397	87.781	712	0	intergenic
413	BniHAT1	B4	22694566	22693899	88.029	685	0	1kb_flank	BniB04g041310.2N.1
414	BniHAT1	B4	10878640	10878071	90.988	577	0	intergenic
415	BniHAT1	B4	20308900	20309562	87.427	684	0	intergenic
416	BniHAT1	B4	27304771	27305458	87.037	702	0	2kb_flank	BniB04g047010.2N.1	AT1G31175	BniB04g047010.2N.1
417	BniHAT1	B4	52382184	52381473	86.471	717	0	intergenic
418	BniHAT1	B4	16511163	16510512	87.097	682	0	1kb_flank	BniB04g030780.2N.1	AT1G09010	BniB04g030780.2N.1		BniB03g003040.2N.1
419	BniHAT1	B4	7614667	7614051	88.117	648	0	intergenic
420	BniHAT1	B4	50888735	50888081	86.784	681	0	1kb_flank	BniB04g059480.2N.1
421	BniHAT1	B4	13003568	13004130	90.351	570	0	intergenic
422	BniHAT1	B4	27328587	27329272	85.634	710	0	1kb_flank	BniB04g047050.2N.1	AT1G31220	BniB04g047050.2N.1
423	BniHAT1	B4	18668018	18668646	86.83	653	0	1kb_flank	BniB04g035190.2N.1	AT1G20560	BniB04g035190.2N.1
424	BniHAT1	B4	25714749	25714211	89.762	547	0	intergenic
425	BniHAT1	B4	6109331	6109988	85.401	685	0	1kb_flank	BniB04g012700.2N.1
426	BniHAT1	B4	10463300	10463906	85.891	645	0	1kb_flank	BniB04g020200.2N.1	AT1G60440	BniB04g020200.2N.1
427	BniHAT1	B4	10985044	10985714	81.53	693	1.2e-149	intergenic
428	BniHAT1	B4	1443967	1444643	81.089	698	1.21e-144	2kb_flank	BniB04g002980.2N.1	AT5G60930	BniB02g076170.2N.1		BniB04g002980.2N.1
429	BniHAT1	B4	15015333	15014660	80.891	696	7.26e-142	1kb_flank	BniB04g027590.2N.1
430	BniHAT1	B4	50295235	50294565	80.808	693	2.61e-141	1kb_flank	BniB04g058620.2N.1	AT1G51440	BniB04g058620.2N.1
431	BniHAT1	B4	46203088	46202419	80.46	696	9.45e-136	intergenic
432	BniHAT1	B4	18173408	18172735	80.288	695	3.4e-135	2kb_flank	BniB04g034180.2N.1
433	BniHAT1	B4	11978376	11977741	77.956	685	2.76e-101	intron	BniB04g022270.2N.1	AT1G63730	BniB04g022270.2N.1	BniB04g023990.2N.1
434	BniHAT1	B4	18329361	18328721	77.859	682	1.28e-99	intergenic

## Sheet: Table S8
Table S8. Members and position annotation of BniHAT-2 family members in the B. nigra genome
												Brassica nigra Paralog genes
#	ID	Chr#	Start	End	Identity	Size	E-value	MITE Position	B. nigra _gene	Arabidopsis ortholog	LF	MF1	MF2
1	BniHAT2	B1	2006767	2007432	100	666	0	1kb_flank	BniB01g003970.2N.1
2	BniHAT2	B1	49757419	49758069	94.411	662	0	2kb_flank	BniB01g046180.2N.1	AT3G18370	BniB01g046180.2N.1
3	BniHAT2	B1	56929340	56929997	93.825	664	0	1kb_flank	BniB01g060610.2N.1	AT3G01330	BniB01g060610.2N.1
4	BniHAT2	B1	53961873	53962535	93.553	667	0	exon	BniB01g054500.2N.1	AT3G10520	BniB01g054500.2N.1	BniB07g057620.2N.1
5	BniHAT2	B1	9423275	9423938	93.274	669	0	1kb_flank	BniB01g016940.2N.1
6	BniHAT2	B1	50889138	50889805	92.825	669	0	2kb_flank	BniB01g048240.2N.1	AT3G16420	BniB01g048240.2N.1
7	BniHAT2	B1	52370967	52370319	93.223	664	0	intergenic
8	BniHAT2	B1	12435879	12435227	92.676	669	0	intergenic
9	BniHAT2	B1	3744910	3744259	91.904	667	0	intergenic
10	BniHAT2	B1	47613389	47612730	91.617	668	0	1kb_flank	BniB01g042780.2N.1	AT3G20890	BniB01g042780.2N.1		BniB07g031560.2N.1
11	BniHAT2	B1	2155630	2156304	91.137	677	0	2kb_flank	BniB01g004280.2N.1	AT2G41190	BniB01g004280.2N.1	BniB06g000510.2N.1	BniB08g026780.2N.1
12	BniHAT2	B1	2490252	2490911	91.018	668	0	2kb_flank	BniB01g005040.2N.1	AT2G40330	BniB01g005040.2N.1	BniB06g004510.2N.1	BniB08g026100.2N.1
13	BniHAT2	B1	51475131	51474466	90.722	679	0	2kb_flank	BniB01g049260.2N.1	AT3G15640	BniB01g049260.2N.1	BniB07g054070.2N.1	BniB07g028370.2N.1
14	BniHAT2	B1	39364965	39364316	90.95	663	0	1kb_flank	BniB01g035100.2N.1
15	BniHAT2	B1	4921083	4920465	92.147	624	0	intergenic
16	BniHAT2	B1	15002662	15003272	91.158	622	0	1kb_flank	BniB01g024370.2N.1
17	BniHAT2	B1	55928416	55929017	89.331	628	0	1kb_flank	BniB01g058650.2N.1	AT3G04940	BniB01g058650.2N.1		BniB07g033170.2N.1
18	BniHAT2	B1	7786253	7785684	90.051	593	0	1kb_flank	BniB01g014570.2N.1
19	BniHAT2	B1	52279735	52280374	84.108	667	1.14e-174	intergenic
20	BniHAT2	B1	8601237	8600576	78.382	680	1.61e-113	intergenic
21	BniHAT2	B1	3437079	3437716	77.893	674	1.63e-103	1kb_flank	BniB01g006770.2N.1	AT2G38060	BniB01g006770.2N.1
22	BniHAT2	B1	51540179	51539549	78.009	673	5.87e-103	2kb_flank	BniB01g049370.2N.1	AT3G15540	BniB01g049370.2N.1	BniB07g054140.2N.1	BniB07g028320.2N.1
23	BniHAT2	B1	10317214	10316569	77.761	679	2.11e-102	1kb_flank	BniB01g018230.2N.1
24	BniHAT2	B1	11981311	11980668	77.581	678	3.53e-100	intergenic
25	BniHAT2	B1	1142100	1142793	74.965	711	1.03e-70	1kb_flank	BniB01g002310.2N.1	AT2G43950	BniB01g002310.2N.1		BniB08g028700.2N.1
26	BniHAT2	B1	51550683	51549996	74.858	704	4.77e-69	1kb_flank	BniB01g049400.2N.1
27	BniHAT2	B1	45286330	45285646	74.326	705	2.89e-61	intergenic
28	BniHAT2	B1	14343340	14342656	73.391	699	2.27e-52	1kb_flank	BniB01g023590.2N.1
29	BniHAT2	B7	44925744	44926408	94.469	669	0	1kb_flank	BniB07g037080.2N.1
30	BniHAT2	B7	2930848	2931507	93.253	667	0	intergenic
31	BniHAT2	B7	52771347	52772021	92.762	677	0	2kb_flank	BniB07g051180.2N.1	AT3G19553	BniB01g044640.2N.1	BniB07g051180.2N.1
32	BniHAT2	B7	53583887	53583231	93.192	661	0	intergenic
33	BniHAT2	B7	7566450	7567115	92.825	669	0	intergenic
34	BniHAT2	B7	51403952	51404629	92.489	679	0	1kb_flank	BniB07g048720.2N.1	AT3G23230	BniB01g038940.2N.1	BniB07g048700.2N.1
35	BniHAT2	B7	43334740	43334088	92.943	666	0	1kb_flank	BniB07g034180.2N.1	AT3G03090	BniB01g061650.2N.1	BniB07g060850.2N.1	BniB07g034180.2N.1
36	BniHAT2	B7	47007028	47006369	92.654	667	0	2kb_flank	BniB07g040860.2N.1	AT5G23260	BniB02g076490.2N.1	BniB04g003160.2N.1	BniB07g040860.2N.1
37	BniHAT2	B7	53300448	53301114	92.399	671	0	1kb_flank	BniB07g052260.2N.1	AT3G17950		BniB07g052260.2N.1
38	BniHAT2	B7	54995240	54995916	92.194	679	0	1kb_flank	BniB07g055870.2N.1
39	BniHAT2	B7	52781809	52781145	92.066	668	0	intron	BniB07g051190.2N.1	AT3G19550	BniB01g044650.2N.1	BniB07g051190.2N.1
40	BniHAT2	B7	55000981	55001658	91.618	680	0	1kb_flank	BniB07g055900.2N.1	AT3G13040		BniB07g055900.2N.1	BniB07g026700.2N.1
41	BniHAT2	B7	36994500	36993846	91.766	668	0	2kb_flank	BniB07g023790.2N.1	AT4G18880	BniB05g017500.2N.1	BniB02g071670.2N.1	BniB07g023790.2N.1
42	BniHAT2	B7	40801616	40802265	91.154	667	0	1kb_flank	BniB07g029870.2N.1	AT3G18050	BniB01g046540.2N.1		BniB07g029870.2N.1
43	BniHAT2	B7	44579888	44580546	90.896	670	0	1kb_flank	BniB07g036510.2N.1	AT3G29030	BniB02g068550.2N.1	BniB04g006680.2N.1	BniB07g036510.2N.1
44	BniHAT2	B7	51501241	51501879	91.252	663	0	1kb_flank	BniB07p000217.2N.1
45	BniHAT2	B7	39348034	39348677	90.705	667	0	intergenic
46	BniHAT2	B7	53210144	53210749	91.626	621	0	intergenic
47	BniHAT2	B7	46478919	46479578	89.521	668	0	1kb_flank	BniB07g039860.2N.1	AT5G25240		BniB04g003830.2N.1	BniB07g039860.2N.1
48	BniHAT2	B7	45998643	45999309	89.27	671	0	intergenic
49	BniHAT2	B7	5030695	5031331	89.955	667	0	intergenic
50	BniHAT2	B7	5102433	5103075	89.599	673	0	intergenic
51	BniHAT2	B7	51336126	51335511	90.72	625	0	2kb_flank	BniB07g048670.2N.1	AT3G23250	BniB01g038850.2N.1	BniB07g048670.2N.1	BniB03g025120.2N.1
52	BniHAT2	B7	41044865	41045503	89.403	670	0	2kb_flank	BniB07g030200.2N.1	AT3G18860	BniB01g045490.2N.1		BniB07g030200.2N.1
53	BniHAT2	B7	52370139	52370783	89.072	668	0	1kb_flank	BniB07g050350.2N.1	AT3G20820	BniB01g042890.2N.1	BniB07g050350.2N.1
54	BniHAT2	B7	54290929	54290272	87.706	667	0	2kb_flank	BniB07g054520.2N.1	AT3G15095	BniB01g049930.2N.1	BniB07g054520.2N.1
55	BniHAT2	B7	2558775	2559425	87.387	666	0	1kb_flank	BniB07g002840.2N.1
56	BniHAT2	B7	37843385	37842753	84.077	672	6.88e-172	1kb_flank	BniB07g025050.2N.1	AT3G10985	BniB01g054040.2N.1	BniB07g057230.2N.1	BniB07g025050.2N.1
57	BniHAT2	B7	53958838	53958187	78.73	677	9.62e-116	2kb_flank	BniB07g053650.2N.1	AT3G16130	BniB01g048770.2N.1	BniB07g053650.2N.1
58	BniHAT2	B7	39498323	39498967	77.991	677	3.51e-105	1kb_flank	BniB07g027900.2N.1
59	BniHAT2	B7	52468027	52468646	78.341	651	3.51e-105	2kb_flank	BniB07g050510.2N.1	AT3G20557	BniB01g043230.2N.1	BniB07g050510.2N.1
60	BniHAT2	B7	39652055	39652696	77.893	674	1.26e-104	2kb_flank	BniB07g028180.2N.1	AT3G15356	BniB01g049670.2N.1		BniB07g028180.2N.1
61	BniHAT2	B7	44957676	44957016	76.957	677	2.13e-97	2kb_flank	BniB07g037140.2N.1	AT5G48230	BniB02g069420.2N.1		BniB07g037140.2N.1
62	BniHAT2	B7	40981775	40981089	75.389	707	1.7e-73	1kb_flank	BniB07g030090.2N.1	AT3G18715	BniB01g045720.2N.1	BniB07g051840.2N.1	BniB07g030090.2N.1
63	BniHAT2	B7	3371606	3372299	75.105	711	2.2e-72	1kb_flank	BniB07g003940.2N.1	AT1G51950	BniB04g057920.2N.1	BniB06g028690.2N.1	BniB07g003940.2N.1
64	BniHAT2	B7	39027815	39028439	75.407	675	2.85e-71	intergenic
65	BniHAT2	B7	57608812	57608217	75.714	630	2.85e-71	2kb_flank	BniB07g061690.2N.1	AT5G15110	BniB02g047830.2N.1	BniB08g007170.2N.1	BniB05g023480.2N.1
66	BniHAT2	B7	49427235	49427928	74.965	711	1.03e-70	intergenic
67	BniHAT2	B7	40664711	40664023	74.894	705	4.77e-69	intron	BniB07g029660.2N.1	AT3G17710			BniB07g029660.2N.1
68	BniHAT2	B7	54531137	54531831	74.824	711	4.77e-69	1kb_flank	BniB07g054980.2N.1	AT3G14230	BniB01g050850.2N.1	BniB07g054980.2N.1	BniB07g027580.2N.1
69	BniHAT2	B7	50816663	50817357	74.825	715	2.22e-67	intron	BniB07g047790.2N.1	AT3G24420	BniB01g036770.2N.1	BniB07g047790.2N.1
70	BniHAT2	B7	51160717	51161371	74.412	680	2.87e-66	intergenic
71	BniHAT2	B7	27000270	27000944	74.106	699	3.74e-60	intergenic
72	BniHAT2	B7	48706400	48707073	74.277	692	1.34e-59	1kb_flank	BniB07g044150.2N.1	AT5G66700	BniB06g015360.2N.1	BniB07g044150.2N.1	BniB04g000220.2N.1
73	BniHAT2	B7	51967671	51968326	73.83	684	1.74e-58	intergenic
74	BniHAT2	B7	49263226	49262540	73.975	707	8.09e-57	intergenic
75	BniHAT2	B7	737948	738622	73.775	694	3.77e-55	intergenic
76	BniHAT2	B7	2698820	2698134	73.475	705	8.15e-52	2kb_flank	BniB07g003040.2N.1
77	BniHAT2	B7	45139067	45138413	73.512	672	1.36e-49	2kb_flank	BniB07g037360.2N.1	AT5G48430			BniB07g037360.2N.1
78	BniHAT2	B7	54310311	54310991	73.209	698	1.76e-48	2kb_flank	BniB07g054580.2N.1	AT3G14950	BniB01g050090.2N.1	BniB07g054580.2N.1
79	BniHAT2	B2	9859633	9858968	94.17	669	0	2kb_flank	BniB02g015880.2N.1	AT2G19860	BniB03g069340.2N.1	BniB02g015880.2N.1	BniB04g024690.2N.1
80	BniHAT2	B2	2109916	2110581	93.722	669	0	1kb_flank	BniB02g004290.2N.1	AT1G08630	BniB04g031080.2N.1	BniB02g004290.2N.1	BniB03g002840.2N.1
81	BniHAT2	B2	45895891	45895227	93.703	667	0	1kb_flank	BniB02g039180.2N.1	AT5G59590	BniB02g039180.2N.1		BniB05g039150.2N.1
82	BniHAT2	B2	59930941	59930276	93.423	669	0	intron	BniB02g066450.2N.1	AT3G25830	BniB02g066450.2N.1
83	BniHAT2	B2	63040744	63041411	93.294	671	0	1kb_flank	BniB02g072590.2N.1	AT4G17550	BniB05g018830.2N.1	BniB02g072590.2N.1	BniB07g022890.2N.1
84	BniHAT2	B2	9001959	9002615	93.403	667	0	intergenic
85	BniHAT2	B2	70238492	70239155	92.825	669	0	1kb_flank	BniB02g088470.2N.1	AT4G37260	BniB05g001620.2N.1	BniB02g088470.2N.1	BniB03g014230.2N.1
86	BniHAT2	B2	346900	347548	92.932	665	0	2kb_flank	BniB02g000620.2N.1	AT1G01140	BniB03g037290.2N.1	BniB02g000620.2N.1
87	BniHAT2	B2	49326733	49327408	92.353	680	0	intergenic
88	BniHAT2	B2	42179667	42180343	91.924	681	0	intergenic
89	BniHAT2	B2	51346093	51346740	92.587	661	0	1kb_flank	BniB02g049590.2N.1	AT5G12900	BniB02g049590.2N.1	BniB08g005990.2N.1	BniB05g025250.2N.1
90	BniHAT2	B2	50474202	50473558	92.078	669	0	1kb_flank	BniB02g047720.2N.1	AT5G15150	BniB02g047720.2N.1	BniB08g007210.2N.1	BniB05g023440.2N.1
91	BniHAT2	B2	8428890	8428245	91.892	666	0	2kb_flank	BniB02g014050.2N.1	AT2G17710	BniB03g065850.2N.1	BniB02g014050.2N.1
92	BniHAT2	B2	50451550	50452201	91.454	667	0	2kb_flank	BniB02g047690.2N.1	AT5G15180	BniB02g047690.2N.1		BniB05g023420.2N.1
93	BniHAT2	B2	55437771	55437122	91.403	663	0	1kb_flank	BniB02g058720.2N.1	AT1G62810		BniB02g058720.2N.1
94	BniHAT2	B2	45467318	45466661	90.936	673	0	intergenic
95	BniHAT2	B2	46957851	46958514	90.476	672	0	intergenic
96	BniHAT2	B2	47402356	47401712	90.691	666	0	2kb_flank	BniB02g041710.2N.1	AT5G21170	BniB02g041710.2N.1		BniB05g042320.2N.1
97	BniHAT2	B2	47403000	47402364	90.578	658	0	2kb_flank	BniB02g041710.2N.1	AT5G21170	BniB02g041710.2N.1		BniB05g042320.2N.1
98	BniHAT2	B2	70303324	70303987	89.238	669	0	intergenic
99	BniHAT2	B2	47403641	47403008	89.41	661	0	intergenic
100	BniHAT2	B2	61984050	61983394	88.69	672	0	intron	BniB02g070660.2N.1	AT4G21640	BniB05g015490.2N.1	BniB02g070660.2N.1
101	BniHAT2	B2	5701063	5701694	88.772	668	0	intergenic
102	BniHAT2	B2	65059314	65058678	88.191	669	0	1kb_flank	BniB02g077120.2N.1	AT5G24270	BniB02g077120.2N.1	BniB04g003410.2N.1	BniB07g040220.2N.1
103	BniHAT2	B2	1722335	1721742	89.298	598	0	intergenic
104	BniHAT2	B2	42829329	42828696	82.511	669	9.09e-156	1kb_flank	BniB02g034440.2N.1	AT5G55730	BniB02g034440.2N.1	BniB08g014970.2N.1	BniB05g035500.2N.1
105	BniHAT2	B2	68517266	68517916	78.287	677	3.48e-110	intron	BniB02g084620.2N.1	AT4G30280		BniB02g084620.2N.1
106	BniHAT2	B2	43175982	43176659	78.417	695	4.51e-109	intergenic
107	BniHAT2	B2	43887841	43888488	77.185	675	2.75e-96	intergenic
108	BniHAT2	B2	49620034	49619393	77.117	673	2.75e-96	1kb_flank	BniB02g045790.2N.1
109	BniHAT2	B2	49434040	49433396	75.959	678	7.81e-82	1kb_flank	BniB02g045380.2N.1
110	BniHAT2	B2	51774935	51775628	74.93	710	1.03e-70	2kb_flank	BniB02g050520.2N.1
111	BniHAT2	B2	3431746	3432428	74.678	699	2.87e-66	intron	BniB02g006450.2N.1
112	BniHAT2	B2	8422651	8423344	73.803	710	2.25e-57	1kb_flank	BniB02g014040.2N.1
113	BniHAT2	B2	66976421	66975771	73.463	667	1.36e-49	2kb_flank	BniB02g080960.2N.1	AT4G24060	BniB05g013180.2N.1	BniB02g080960.2N.1	BniB03g013700.2N.1
114	BniHAT2	B2	48922005	48922685	72.843	707	1.78e-43	1kb_flank	BniB02g044350.2N.1	AT5G18360	BniB02g044350.2N.1	BniB08g009150.2N.1
115	BniHAT2	B2	46070600	46069935	72.54	681	6.39e-43	intergenic
116	BniHAT2	B3	14473711	14473046	94.012	668	0	1kb_flank	BniB03g030920.2N.1	AT1G23420	BniB04g038750.2N.1	BniB03g030920.2N.1
117	BniHAT2	B3	20364993	20365655	93.253	667	0	1kb_flank	BniB03g040380.2N.1	AT1G70895	BniB03g048800.2N.1	BniB05g068390.2N.1	BniB03g040380.2N.1
118	BniHAT2	B3	24378565	24377900	92.814	668	0	2kb_flank	BniB03g046580.2N.1	AT1G69200	BniB03g046580.2N.1
119	BniHAT2	B3	28616158	28616810	93.093	666	0	intron	BniB03g053460.2N.1	AT1G75050	BniB03g053460.2N.1	BniB05g071670.2N.1	BniB06g048310.2N.1
120	BniHAT2	B3	16043820	16044482	92.804	667	0	2kb_flank	BniB03g033580.2N.1	AT1G29150	BniB04g043660.2N.1	BniB03g033580.2N.1	BniB03g016790.2N.1
121	BniHAT2	B3	6527414	6528077	92.665	668	0	intergenic
122	BniHAT2	B3	18820993	18820338	92.814	668	0	2kb_flank	BniB03g037600.2N.1	AT1G02220	BniB03g037600.2N.1
123	BniHAT2	B3	22492793	22492139	92.804	667	0	intergenic
124	BniHAT2	B3	14823135	14822484	92.804	667	0	2kb_flank	BniB03g031590.2N.1	AT1G26620	BniB04g040220.2N.1	BniB03g031590.2N.1	BniB03g018750.2N.1
125	BniHAT2	B3	8862776	8863441	92.444	675	0	2kb_flank	BniB03g020150.2N.1	AT1G21910	BniB04g036750.2N.1	BniB03g029840.2N.1	BniB03g020150.2N.1
126	BniHAT2	B3	5678341	5677688	92.515	668	0	2kb_flank	BniB03g013640.2N.1	AT4G23700	BniB05g013470.2N.1	BniB02g080680.2N.1	BniB03g013640.2N.1
127	BniHAT2	B3	17619197	17618538	92.365	668	0	intergenic
128	BniHAT2	B3	18451798	18452467	92.262	672	0	1kb_flank	BniB03g036920.2N.1	AT1G01650	BniB03g036920.2N.1	BniB02g000710.2N.1
129	BniHAT2	B3	10355991	10355337	92.365	668	0	1kb_flank	BniB03g022960.2N.1	AT4G19900			BniB03g022960.2N.1
130	BniHAT2	B3	21251266	21251921	92.308	663	0	intergenic
131	BniHAT2	B3	2047388	2046713	91.74	678	0	2kb_flank	BniB03g005140.2N.1
132	BniHAT2	B3	53855550	53854897	91.916	668	0	intergenic
133	BniHAT2	B3	52648103	52647419	91.279	688	0	1kb_flank	BniB03g067870.2N.1
134	BniHAT2	B3	17198457	17199103	91.604	667	0	intergenic
135	BniHAT2	B3	11411098	11410441	91.233	673	0	intergenic
136	BniHAT2	B3	20532528	20533177	91.304	667	0	1kb_flank	BniB03g040720.2N.1
137	BniHAT2	B3	25160165	25159524	91.265	664	0	2kb_flank	BniB03g047900.2N.1
138	BniHAT2	B3	3856774	3857424	90.868	668	0	intergenic
139	BniHAT2	B3	3032749	3032110	91.131	654	0	1kb_flank	BniB03g007750.2N.1
140	BniHAT2	B3	12992968	12992316	90.284	669	0	intergenic
141	BniHAT2	B3	14573899	14573256	90.255	667	0	1kb_flank	BniB03g031130.2N.1	AT1G24020		BniB03g031130.2N.1
142	BniHAT2	B3	11053039	11053615	92.929	594	0	2kb_flank	BniB03g024560.2N.1	AT3G06483	BniB01g057170.2N.1		BniB03g024560.2N.1
143	BniHAT2	B3	29835433	29836072	84.812	665	0	2kb_flank	BniB03g055270.2N.1	AT1G76350	BniB03g055270.2N.1		BniB06g049080.2N.1
144	BniHAT2	B3	11963854	11964418	83.871	589	9.15e-151	intron	BniB03g026330.2N.1	AT1G15550	BniB06g040970.2N.1	BniB03g026330.2N.1
145	BniHAT2	B3	13043423	13042763	79.794	678	1.22e-129	intergenic
146	BniHAT2	B3	10259658	10258999	79.646	678	5.67e-128	2kb_flank	BniB03g022730.2N.1	AT4G20200			BniB03g022730.2N.1
147	BniHAT2	B3	21692082	21691432	80.176	681	2.04e-127	intron	BniB03g042290.2N.1
148	BniHAT2	B3	26091767	26092399	78.987	671	3.46e-115	intron	BniB03g049310.2N.1	AT1G71400	BniB03g049310.2N.1	BniB05g068750.2N.1
149	BniHAT2	B3	12993747	12994389	78.55	676	2.69e-111	intergenic
150	BniHAT2	B3	9439361	9440007	78.203	679	2.1e-107	intron	BniB03g021260.2N.1
151	BniHAT2	B3	19182152	19181526	78.221	652	4.54e-104	intron	BniB03g038380.2N.1
152	BniHAT2	B3	8341614	8340989	77.778	666	1.27e-99	2kb_flank	BniB03g019000.2N.1	AT1G27000	BniB04g039730.2N.1		BniB03g019000.2N.1
153	BniHAT2	B3	9305768	9306420	76.912	680	4.6e-94	intergenic
154	BniHAT2	B3	29064096	29064787	75.316	713	1.7e-73	2kb_flank	BniB03g054060.2N.1
155	BniHAT2	B3	18619867	18620559	74.789	710	1.72e-68	2kb_flank	BniB03g037250.2N.1	AT1G01190	BniB03g037250.2N.1	BniB02g000590.2N.1
156	BniHAT2	B3	18846314	18845627	74.61	705	1.03e-65	1kb_flank	BniB03g037650.2N.1
157	BniHAT2	B3	3786715	3787405	74.326	705	6.21e-63	1kb_flank	BniB03g009540.2N.1	AT4G33330	BniB05g004770.2N.1		BniB03g009540.2N.1
158	BniHAT2	B3	50551367	50550678	74.221	706	2.89e-61	1kb_flank	BniB03g066050.2N.1	AT2G17845	BniB03g066050.2N.1
159	BniHAT2	B3	53987047	53987733	74.111	703	3.74e-60	intergenic
160	BniHAT2	B3	16615239	16614551	74.043	705	4.84e-59	2kb_flank	BniB03g034310.2N.1	AT1G30270	BniB04g045660.2N.1	BniB03g034310.2N.1	BniB03g016170.2N.1
161	BniHAT2	B3	7741931	7742597	73.525	695	6.3e-53	1kb_flank	BniB03g017570.2N.1	AT1G27620	BniB04g041910.2N.1		BniB03g017570.2N.1
162	BniHAT2	B3	29676868	29677546	73.276	696	1.05e-50	1kb_flank	BniB03g054910.2N.1	AT1G76100	BniB03g054910.2N.1
163	BniHAT2	B3	27798680	27799351	73.314	697	1.36e-49	1kb_flank	BniB03g051900.2N.1	AT1G73590	BniB03g051900.2N.1	BniB05g070760.2N.1
164	BniHAT2	B3	12871982	12872652	73.027	697	1.06e-45	intergenic
165	BniHAT2	B3	20930958	20930266	73.109	714	3.82e-45	2kb_flank	BniB03g041360.2N.1	AT1G69588	BniB03g047090.2N.1	BniB05g066550.2N.1	BniB03g041360.2N.1
166	BniHAT2	B3	20623980	20623302	72.414	696	1.79e-38	1kb_flank	BniB03g040860.2N.1	AT1G70170	BniB03g047890.2N.1		BniB03g040860.2N.1
167	BniHAT2	B3	10298069	10298729	72.086	695	3.02e-31	1kb_flank	BniB03g022850.2N.1
168	BniHAT2	B8	9952714	9953377	94.003	667	0	2kb_flank	BniB08g020410.2N.1
169	BniHAT2	B8	9354437	9355097	93.967	663	0	intron	BniB08g019360.2N.1	AT2G31110	BniB01g013020.2N.1		BniB08g019360.2N.1
170	BniHAT2	B8	13204444	13205108	93.423	669	0	intergenic
171	BniHAT2	B8	13175605	13174945	93.083	665	0	intergenic
172	BniHAT2	B8	7711395	7710727	92.846	671	0	intergenic
173	BniHAT2	B8	55988283	55987615	92.91	677	0	1kb_flank	BniB08g059070.2N.1	AT3G46270	BniB08g059070.2N.1
174	BniHAT2	B8	65402836	65402179	92.964	668	0	1kb_flank	BniB08p000262.2N.1
175	BniHAT2	B8	59874087	59873430	92.676	669	0	2kb_flank	BniB08g063790.2N.1	AT3G49880	BniB08g063790.2N.1	BniB05g047710.2N.1
176	BniHAT2	B8	11975222	11974565	92.504	667	0	intergenic
177	BniHAT2	B8	67262931	67262280	92.643	666	0	1kb_flank	BniB08g077060.2N.1	AT3G63110	BniB08g077060.2N.1	BniB06g061210.2N.1
178	BniHAT2	B8	13388552	13389215	92.273	673	0	intergenic
179	BniHAT2	B8	51383003	51382336	92.239	670	0	1kb_flank	BniB08g056520.2N.1
180	BniHAT2	B8	25843732	25843080	92.342	666	0	2kb_flank	BniB08g041630.2N.1	AT4G00740		BniB08g041630.2N.1
181	BniHAT2	B8	673410	674068	92.042	666	0	1kb_flank	BniB08g001310.2N.1	AT5G03840	BniB02g056740.2N.1	BniB08g001310.2N.1	BniB05g030210.2N.1
182	BniHAT2	B8	49303655	49304311	91.617	668	0	1kb_flank	BniB08g055970.2N.1
183	BniHAT2	B8	22151875	22152529	91.317	668	0	1kb_flank	BniB08g037230.2N.1
184	BniHAT2	B8	11860353	11859701	91.154	667	0	intergenic
185	BniHAT2	B8	3436636	3435987	91.018	668	0	1kb_flank	BniB08g007100.2N.1	AT5G14910		BniB08g007100.2N.1	BniB05g023680.2N.1
186	BniHAT2	B8	34791356	34792016	90.255	667	0	1kb_flank	BniB08g051440.2N.1	AT4G10925	BniB08g051440.2N.1
187	BniHAT2	B8	11250021	11250659	90.405	667	0	1kb_flank	BniB08g022650.2N.1	AT2G35940	BniB01g008450.2N.1	BniB06g008200.2N.1	BniB08g022650.2N.1
188	BniHAT2	B8	14364921	14365550	89.442	663	0	intergenic
189	BniHAT2	B8	6993129	6992464	88.376	671	0	intergenic
190	BniHAT2	B8	22848976	22849618	88.771	659	0	intergenic
191	BniHAT2	B8	16178023	16178650	88.156	667	0	intergenic
192	BniHAT2	B8	12464424	12465098	86.351	696	0	2kb_flank	BniB08g024410.2N.1
193	BniHAT2	B8	15730800	15730164	86.316	665	0	1kb_flank	BniB08g029790.2N.1
194	BniHAT2	B8	17216027	17216681	78.838	671	5.75e-118	intergenic
195	BniHAT2	B8	16141444	16142092	78.625	669	1.61e-113	intergenic
196	BniHAT2	B8	12013581	12014258	77.41	695	1.64e-98	intergenic
197	BniHAT2	B8	24956256	24955592	77.16	683	1.66e-93	1kb_flank	BniB08g040480.2N.1
198	BniHAT2	B8	5938623	5939258	76.981	669	5.96e-93	1kb_flank	BniB08g012880.2N.1	AT5G58920		BniB08g012880.2N.1	BniB05g038340.2N.1
199	BniHAT2	B8	23017684	23018309	76.577	666	1e-85	1kb_flank	BniB08g038060.2N.1	AT4G04570		BniB08g038060.2N.1	BniB05g056170.2N.1
200	BniHAT2	B8	22046204	22045516	74.894	705	4.77e-69	1kb_flank	BniB08g037090.2N.1
201	BniHAT2	B8	27313750	27314444	74.824	711	4.77e-69	2kb_flank	BniB08g043850.2N.1	AT4G01520	BniB08g043880.2N.1
202	BniHAT2	B8	26659242	26659933	74.646	706	1.72e-68	1kb_flank	BniB08g042890.2N.1
203	BniHAT2	B8	17956274	17956968	74.684	711	2.22e-67	1kb_flank	BniB08g032580.2N.1
204	BniHAT2	B8	56295148	56295839	74.579	712	3.71e-65	1kb_flank	BniB08g059350.2N.1	AT3G46640	BniB08g059350.2N.1		BniB06g024620.2N.1
205	BniHAT2	B8	11652211	11651529	74.322	701	2.23e-62	1kb_flank	BniB08g023260.2N.1	AT2G36830	BniB01g007810.2N.1		BniB08g023260.2N.1
206	BniHAT2	B8	5721498	5722181	74.037	701	1.74e-58	intron	BniB08g012400.2N.1	AT5G59530		BniB08g012400.2N.1
207	BniHAT2	B8	11721674	11721007	73.963	699	8.09e-57	intergenic
208	BniHAT2	B8	5685911	5685224	73.438	704	2.27e-52	1kb_flank	BniB08g012350.2N.1	AT5G59540		BniB08g012350.2N.1	BniB05g039120.2N.1
209	BniHAT2	B8	2291545	2292227	73.324	701	3.79e-50	2kb_flank	BniB08g004680.2N.1	AT5G10510	BniB02g051400.2N.1	BniB08g004680.2N.1	BniB05g026660.2N.1
210	BniHAT2	B4	53675335	53675997	94.012	668	0	1kb_flank	BniB04g062980.2N.1	AT1G48100	BniB04g062980.2N.1
211	BniHAT2	B4	12645376	12644715	93.853	667	0	2kb_flank	BniB04g023370.2N.1
212	BniHAT2	B4	10485836	10485173	93.713	668	0	1kb_flank	BniB04g020220.2N.1	AT1G10630			BniB03g004020.2N.1
213	BniHAT2	B4	5172158	5172817	93.413	668	0	intergenic
214	BniHAT2	B4	18218064	18217405	93.393	666	0	1kb_flank	BniB04g034280.2N.1	AT1G19530	BniB04g034280.2N.1
215	BniHAT2	B4	6893278	6893939	93.233	665	0	intergenic
216	BniHAT2	B4	11322741	11322080	93.103	667	0	intergenic
217	BniHAT2	B4	53689286	53688625	93.103	667	0	intergenic
218	BniHAT2	B4	14939633	14940294	93.083	665	0	1kb_flank	BniB04g027400.2N.1	AT1G12663	BniB04g027400.2N.1	BniB02g007540.2N.1
219	BniHAT2	B4	1185947	1186608	92.964	668	0	1kb_flank	BniB04g002450.2N.1	AT5G62140			BniB04g002450.2N.1
220	BniHAT2	B4	28320699	28320042	92.975	669	0	1kb_flank	BniB04g048060.2N.1
221	BniHAT2	B4	8835548	8836210	92.846	671	0	intergenic
222	BniHAT2	B4	19322109	19322777	92.773	678	0	1kb_flank	BniB04g036180.2N.1	AT1G21500	BniB04g036180.2N.1	BniB03g029690.2N.1
223	BniHAT2	B4	12763515	12762860	92.89	661	0	2kb_flank	BniB04g023700.2N.1	AT1G64000	BniB04g022500.2N.1	BniB04g023700.2N.1
224	BniHAT2	B4	14462540	14463194	92.814	668	0	2kb_flank	BniB04g026640.2N.1
225	BniHAT2	B4	12058342	12057684	92.665	668	0	1kb_flank	BniB04g022390.2N.1
226	BniHAT2	B4	54033607	54034264	92.676	669	0	2kb_flank	BniB04g063220.2N.1
227	BniHAT2	B4	11975393	11974737	91.642	670	0	1kb_flank	BniB04g022270.2N.1	AT1G63730	BniB04g022270.2N.1	BniB04g023990.2N.1
228	BniHAT2	B4	7422099	7422788	90.896	692	0	1kb_flank	BniB04g015140.2N.1	AT5G47230	BniB02g063910.2N.1	BniB04g015140.2N.1	BniB04g010320.2N.1
229	BniHAT2	B4	2320151	2319494	91.194	670	0	intergenic
230	BniHAT2	B4	11321377	11320727	91.181	669	0	1kb_flank	BniB04g021310.2N.1
231	BniHAT2	B4	16983425	16982777	90.705	667	0	1kb_flank	BniB04g031830.2N.1	AT1G17440	BniB04g031830.2N.1	BniB03g027530.2N.1
232	BniHAT2	B4	2822205	2821574	91.091	651	0	2kb_flank	BniB04g005700.2N.1
233	BniHAT2	B4	6296857	6297488	90.293	649	0	exon	BniB04g013020.2N.1	AT5G43600	BniB02g061000.2N.1		BniB04g013020.2N.1
234	BniHAT2	B4	10026651	10027306	87.63	671	0	2kb_flank	BniB04g019440.2N.1	AT1G58420	BniB04g019440.2N.1
235	BniHAT2	B4	22464682	22464040	86.191	659	0	2kb_flank	BniB04g041000.2N.1	AT1G25350	BniB04g041000.2N.1
236	BniHAT2	B4	7606574	7605929	78.254	676	4.51e-109	intergenic
237	BniHAT2	B4	17010888	17010245	78.19	674	1.62e-108	2kb_flank	BniB04g031880.2N.1
238	BniHAT2	B4	6136713	6136071	78.19	674	5.83e-108	1kb_flank	BniB04g012740.2N.1	AT5G44200	BniB02g061510.2N.1		BniB04g012740.2N.1
239	BniHAT2	B4	15039291	15039913	78.56	639	2.1e-107	intergenic
240	BniHAT2	B4	16857652	16857010	78.074	675	2.71e-106	2kb_flank	BniB04g031530.2N.1	AT1G17140	BniB06g042530.2N.1	BniB03g027340.2N.1	BniB03g006950.2N.1
241	BniHAT2	B4	15181885	15182534	77.893	674	3.51e-105	intergenic
242	BniHAT2	B4	7160043	7160696	77.713	682	5.87e-103	intergenic
243	BniHAT2	B4	48141570	48140929	77.563	673	3.53e-100	1kb_flank	BniB04g056260.2N.1	AT1G53110	BniB04g056260.2N.1
244	BniHAT2	B4	28005068	28005716	77.353	680	5.91e-98	intergenic
245	BniHAT2	B4	10534627	10533950	77.266	695	2.13e-97	intergenic
246	BniHAT2	B4	23119881	23119309	77.872	592	3.58e-90	2kb_flank	BniB04g042000.2N.1	AT1G27660	BniB04g042000.2N.1		BniB03g017540.2N.1
247	BniHAT2	B4	25040106	25040746	76.627	676	1.67e-88	1kb_flank	BniB04g044510.2N.1
248	BniHAT2	B4	26090182	26090839	76.374	673	1.3e-84	intergenic
249	BniHAT2	B4	12299260	12299953	74.894	709	1.03e-70	intergenic
250	BniHAT2	B4	5831915	5832609	74.86	712	4.77e-69	1kb_flank	BniB04g012150.2N.1
251	BniHAT2	B4	6360664	6361358	74.824	711	4.77e-69	intron	BniB04g013090.2N.1	AT5G43310	BniB02g060790.2N.1		BniB04g013090.2N.1
252	BniHAT2	B4	13416553	13415865	73.277	711	2.28e-47	1kb_flank	BniB04g024850.2N.1	AT2G19660		BniB02g015730.2N.1	BniB04g024850.2N.1
253	BniHAT2	B4	54684858	54685491	72.197	651	3.9e-30	2kb_flank	BniB04g063970.2N.1
254	BniHAT2	B5	56281675	56281009	93.563	668	0	1kb_flank	BniB05g060920.2N.1
255	BniHAT2	B5	63225970	63226636	93.284	670	0	1kb_flank	BniB05g068460.2N.1	AT1G70985	BniB03g048860.2N.1	BniB05g068460.2N.1
256	BniHAT2	B5	10529499	10528842	93.253	667	0	intergenic
257	BniHAT2	B5	62446522	62447189	92.857	672	0	1kb_flank	BniB05g067560.2N.1	AT1G70230	BniB03g047920.2N.1	BniB05g067560.2N.1	BniB03g040810.2N.1
258	BniHAT2	B5	52890154	52889496	92.964	668	0	intergenic
259	BniHAT2	B5	16032215	16031555	92.504	667	0	exon	BniB05g032100.2N.1
260	BniHAT2	B5	67108231	67107561	92.296	675	0	2kb_flank	BniB05g073980.2N.1
261	BniHAT2	B5	65447956	65448612	92.526	669	0	1kb_flank	BniB05g071820.2N.1	AT1G75360	BniB03g053840.2N.1	BniB05g071820.2N.1
262	BniHAT2	B5	8257329	8257990	92.054	667	0	2kb_flank	BniB05g017250.2N.1	AT4G19150	BniB05g017250.2N.1
263	BniHAT2	B5	56087988	56088640	92.216	668	0	1kb_flank	BniB05g060650.2N.1	AT5G50520			BniB05g060650.2N.1
264	BniHAT2	B5	66965567	66966242	91.74	678	0	1kb_flank	BniB05g073790.2N.1	AT1G77620	BniB03g056920.2N.1	BniB05g073790.2N.1
265	BniHAT2	B5	16077198	16076538	92.03	665	0	2kb_flank	BniB05g032190.2N.1	AT5G52570	BniB02g030300.2N.1		BniB05g032190.2N.1
266	BniHAT2	B5	16072643	16073290	92.216	668	0	1kb_flank	BniB05g032190.2N.1	AT5G52570	BniB02g030300.2N.1		BniB05g032190.2N.1
267	BniHAT2	B5	65791681	65792332	92.066	668	0	1kb_flank	BniB05g072200.2N.1	AT1G75710	BniB03g054330.2N.1	BniB05g072200.2N.1	BniB06g048760.2N.1
268	BniHAT2	B5	26709619	26710266	92.054	667	0	intergenic
269	BniHAT2	B5	55461560	55462212	91.904	667	0	1kb_flank	BniB05g060020.2N.1	AT5G51490		BniB08g017770.2N.1	BniB05g060020.2N.1
270	BniHAT2	B5	18792411	18791759	91.754	667	0	2kb_flank	BniB05g036140.2N.1	AT5G56460	BniB02g035450.2N.1		BniB05g036140.2N.1
271	BniHAT2	B5	19327256	19327913	91.629	669	0	intergenic
272	BniHAT2	B5	3855867	3856544	91.163	679	0	1kb_flank	BniB05g007730.2N.1	AT4G29920	BniB05g007730.2N.1	BniB02g084340.2N.1	BniB03g011180.2N.1
273	BniHAT2	B5	26471620	26470969	91.617	668	0	1kb_flank	BniB05g046650.2N.1	AT3G50890	BniB08g064830.2N.1	BniB05g046650.2N.1	BniB02g074990.2N.1
274	BniHAT2	B5	3705051	3705723	91.029	680	0	1kb_flank	BniB05g007500.2N.1	AT4G30190	BniB05g007500.2N.1	BniB02g084560.2N.1	BniB03g011060.2N.1
275	BniHAT2	B5	3845910	3846564	91.168	668	0	intergenic
276	BniHAT2	B5	6229130	6228466	90.788	673	0	intron	BniB05g013230.2N.1	AT4G24000	BniB05g013230.2N.1
277	BniHAT2	B5	66404142	66404789	90.105	667	0	intergenic
278	BniHAT2	B5	64318106	64317451	88.657	670	0	1kb_flank	BniB05g069920.2N.1	AT1G72540	BniB03g050830.2N.1	BniB05g069920.2N.1	BniB03g039620.2N.1
279	BniHAT2	B5	67132855	67133498	87.5	656	0	1kb_flank	BniB05g074020.2N.1
280	BniHAT2	B5	23057184	23056534	86.012	672	0	1kb_flank	BniB05g042210.2N.1	AT5G21960	BniB02g041590.2N.1	BniB08g010890.2N.1	BniB05g042210.2N.1
281	BniHAT2	B5	12239392	12240043	85.842	671	0	intergenic
282	BniHAT2	B5	63030545	63031211	85.524	677	0	1kb_flank	BniB05g068300.2N.1	AT1G70740	BniB03g048590.2N.1	BniB05g068300.2N.1	BniB03g040590.2N.1
283	BniHAT2	B5	701454	700796	78.94	679	4.44e-119	intergenic
284	BniHAT2	B5	24831302	24831958	78.792	679	7.44e-117	1kb_flank	BniB05g044580.2N.1
285	BniHAT2	B5	24854308	24854958	78.9	673	7.44e-117	1kb_flank	BniB05g044630.2N.1	AT5G19110	BniB02g043700.2N.1		BniB05g044630.2N.1
286	BniHAT2	B5	21067101	21067746	78.55	676	2.08e-112	intergenic
287	BniHAT2	B5	21857394	21856760	77.745	674	9.83e-101	1kb_flank	BniB05g040630.2N.1
288	BniHAT2	B5	11480199	11479548	75.664	678	1.31e-79	2kb_flank	BniB05g023380.2N.1	AT5G15230		BniB08g007270.2N.1	BniB05g023380.2N.1
289	BniHAT2	B5	64367669	64366982	75.035	705	1.03e-70	intergenic
290	BniHAT2	B5	25298133	25298827	74.824	711	4.77e-69	1kb_flank	BniB05g045350.2N.1	AT5G18430			BniB05g045350.2N.1
291	BniHAT2	B5	67905111	67905798	74.043	705	3.74e-60	intergenic
292	BniHAT2	B5	49633611	49634259	74.194	682	1.34e-59	1kb_flank	BniB05g055430.2N.1
293	BniHAT2	B5	63709933	63710588	73.964	676	2.27e-52	2kb_flank	BniB05p000282.2N.1
294	BniHAT2	B5	4137422	4136749	71.795	702	1.4e-29	intergenic
295	BniHAT2	B6	56001204	56000562	94.316	651	0	1kb_flank	BniB06g059470.2N.1	AT5G40960	BniB01g025520.2N.1	BniB06g059470.2N.1
296	BniHAT2	B6	11743769	11744438	93.294	671	0	1kb_flank	BniB06g020660.2N.1	AT2G31660	BniB01g012700.2N.1	BniB06g020660.2N.1	BniB08g019740.2N.1
297	BniHAT2	B6	55063661	55064320	93.202	662	0	1kb_flank	BniB06g057680.2N.1	AT3G53890	BniB08g068280.2N.1	BniB06g065840.2N.1	BniB06g057680.2N.1
298	BniHAT2	B6	46557098	46557764	92.814	668	0	intergenic
299	BniHAT2	B6	11552686	11552030	92.804	667	0	2kb_flank	BniB06g020300.2N.1
300	BniHAT2	B6	9986796	9987449	92.354	667	0	2kb_flank	BniB06g018110.2N.1	AT2G28950	BniB01g014940.2N.1	BniB06g018110.2N.1
301	BniHAT2	B6	58151060	58150407	92.365	668	0	intergenic
302	BniHAT2	B6	28681657	28680994	92.078	669	0	intergenic
303	BniHAT2	B6	59200648	59199997	92.388	670	0	1kb_flank	BniB06g065890.2N.1	AT3G53770		BniB06g065890.2N.1
304	BniHAT2	B6	45183898	45184551	92.204	667	0	1kb_flank	BniB06g039670.2N.1	AT1G14480	BniB06g039670.2N.1	BniB02g009490.2N.1
305	BniHAT2	B6	48594607	48593954	92.204	667	0	2kb_flank	BniB06g045390.2N.1	AT1G05280	BniB06g045400.2N.1	BniB02g002260.2N.1	BniB03g001320.2N.1
306	BniHAT2	B6	10378805	10379466	91.828	673	0	intergenic
307	BniHAT2	B6	55964542	55963882	91.815	672	0	2kb_flank	BniB06g059380.2N.1	AT5G41100	BniB01g025260.2N.1	BniB06g059380.2N.1
308	BniHAT2	B6	13164226	13164880	91.791	670	0	intergenic
309	BniHAT2	B6	47318001	47317350	91.566	664	0	1kb_flank	BniB06g043410.2N.1	AT1G07280	BniB06g043410.2N.1	BniB02g003300.2N.1
310	BniHAT2	B6	53980502	53979853	91.454	667	0	intergenic
311	BniHAT2	B6	9910331	9909681	91.304	667	0	intergenic
312	BniHAT2	B6	6516739	6517403	90.597	670	0	1kb_flank	BniB06g012920.2N.1	AT5G64630	BniB06g012920.2N.1
313	BniHAT2	B6	7825504	7824820	89.405	689	0	1kb_flank	BniB06g015250.2N.1	AT5G66800	BniB06g015250.2N.1	BniB07g044070.2N.1
314	BniHAT2	B6	21627363	21627954	92.079	606	0	2kb_flank	BniB06g030670.2N.1
315	BniHAT2	B6	51831513	51832064	91.858	565	0	1kb_flank	BniB06g051080.2N.1	AT1G79680	BniB06g068000.2N.1	BniB05g075200.2N.1	BniB06g051080.2N.1
316	BniHAT2	B6	9690952	9691574	89.03	629	0	intergenic
317	BniHAT2	B6	13498183	13497534	87.82	665	0	1kb_flank	BniB06g023130.2N.1	AT2G33830		BniB06g023130.2N.1	BniB08g021430.2N.1
318	BniHAT2	B6	55874877	55874213	87.111	675	0	2kb_flank	BniB06g059240.2N.1	AT5G41460	BniB01g024900.2N.1	BniB06g059240.2N.1
319	BniHAT2	B6	54174039	54173423	78.825	647	2.1e-107	intergenic
320	BniHAT2	B6	58749115	58748464	77.778	684	2.11e-102	2kb_flank	BniB06g064950.2N.1	AT3G55370	BniB08g069790.2N.1	BniB06g064950.2N.1
321	BniHAT2	B6	50124941	50125609	75.758	693	2.19e-77	1kb_flank	BniB06g048280.2N.1
322	BniHAT2	B6	58328454	58327768	75.389	707	1.7e-73	2kb_flank	BniB06g064120.2N.1
323	BniHAT2	B6	13370313	13370876	76.614	573	2.2e-72	1kb_flank	BniB06g022920.2N.1	AT2G33710	BniB01g010400.2N.1	BniB06g022920.2N.1	BniB08g021370.2N.1
324	BniHAT2	B6	51950726	51951420	74.824	711	4.77e-69	intron	BniB06g051380.2N.1	AT1G80610	BniB06g068350.2N.1	BniB05g075450.2N.1	BniB06g051380.2N.1
325	BniHAT2	B6	10244910	10245598	74.61	705	1.03e-65	intergenic
326	BniHAT2	B6	1187849	1188530	74.571	700	3.71e-65	intron	BniB06g002460.2N.1	AT2G43870	BniB01g002370.2N.1	BniB06g002460.2N.1	BniB08g028670.2N.1
327	BniHAT2	B6	50250680	50250001	74.538	703	1.73e-63	1kb_flank	BniB06g048550.2N.1
328	BniHAT2	B6	58620881	58620204	74.326	705	1.34e-59	intergenic
329	BniHAT2	B6	7962969	7962281	74.043	705	4.84e-59	1kb_flank	BniB06g015550.2N.1
330	BniHAT2	B6	55714039	55713355	74.153	708	2.25e-57	1kb_flank	BniB06g058930.2N.1
331	BniHAT2	B6	6109015	6108331	73.588	708	2.93e-51	intron	BniB06g012030.2N.1	AT5G63760	BniB06g012030.2N.1
